# Supplementary material for: Transcriptional silencing of 35S driven-transgene is differentially determined depending on promoter methylation heterogeneity at specific cytosines in both plus- and minus-sense strands
Source: BMC Plant Biol. 2019 Jan 14;19:24. doi: 10.1186/s12870-019-1628-y (PMC6332629; doi:10.1186/s12870-019-1628-y)
Supplement: Supplementary file 7 — Table S2. Raw data of our clone-based bisulfite sequencing used for Figs. 3 and 5, Additional files 1, 2, 3 and 4: Figures S1–S4. All the graphs for methylation status were calculated in those Excel files. (XLSX 347 kb) [file 12870_2019_1628_MOESM7_ESM.xlsx]

## Sheet: 16C Fig.3a
N=	22
		types	Cme	# samples	% methylation			CG	CHG	CHH
1				22	0		-344	0	0	0			# sites	Cme	%
2				22	0		-343	0	0	0		CHH	1408	39	2.76989
3				22	0		-342	0	0	0		CHG	154	6	3.8961
4				22	0		-341	0	0	0		CG	264	15	5.68182
5				22	0		-340	0	0	0		Total	1826	60	3.28587
6				22	0		-339	0	0	0
7				22	0		-338	0	0	0
8		CHH		22	0		-337	0	0	0
9				22	0		-336	0	0	0
10				22	0		-335	0	0	0
11				22	0		-334	0	0	0
12				22	0		-333	0	0	0
13		CHH		22	0		-332	0	0	0
14				22	0		-331	0	0	0
15				22	0		-330	0	0	0
16		CHH		22	0		-329	0	0	0
17				22	0		-328	0	0	0
18				22	0		-327	0	0	0
19				22	0		-326	0	0	0
20				22	0		-325	0	0	0
21				22	0		-324	0	0	0
22				22	0		-323	0	0	0
23				22	0		-322	0	0	0
24				22	0		-321	0	0	0
25				22	0		-320	0	0	0
26				22	0		-319	0	0	0
27				22	0		-318	0	0	0
28				22	0		-317	0	0	0
29		CHG		22	0		-316	0	0	0
30		CG		22	0		-315	0	0	0
31				22	0		-314	0	0	0
32				22	0		-313	0	0	0
33				22	0		-312	0	0	0
34				22	0		-311	0	0	0
35				22	0		-310	0	0	0
36		CHH		22	0		-309	0	0	0
37		CHH	1	22	4.54545		-308	0	0	4.54545
38				22	0		-307	0	0	0
39		CHH		22	0		-306	0	0	0
40		CHH		22	0		-305	0	0	0
41				22	0		-304	0	0	0
42		CG	1	22	4.54545		-303	4.54545	0	0
43				22	0		-302	0	0	0
44				22	0		-301	0	0	0
45				22	0		-300	0	0	0
46				22	0		-299	0	0	0
47				22	0		-298	0	0	0
48		CHH	1	22	4.54545		-297	0	0	4.54545
49		CHH	1	22	4.54545		-296	0	0	4.54545
50				22	0		-295	0	0	0
51				22	0		-294	0	0	0
52				22	0		-293	0	0	0
53				22	0		-292	0	0	0
54		CHH		22	0		-291	0	0	0
55		CHH	1	22	4.54545		-290	0	0	4.54545
56		CHG	1	22	4.54545		-289	0	4.54545	0
57				22	0		-288	0	0	0
58				22	0		-287	0	0	0
59		CHH		22	0		-286	0	0	0
60				22	0		-285	0	0	0
61				22	0		-284	0	0	0
62				22	0		-283	0	0	0
63		CHG	1	22	4.54545		-282	0	4.54545	0
64				22	0		-281	0	0	0
65				22	0		-280	0	0	0
66				22	0		-279	0	0	0
67		CHH	1	22	4.54545		-278	0	0	4.54545
68				22	0		-277	0	0	0
69		CHH		22	0		-276	0	0	0
70				22	0		-275	0	0	0
71				22	0		-274	0	0	0
72				22	0		-273	0	0	0
73				22	0		-272	0	0	0
74				22	0		-271	0	0	0
75				22	0		-270	0	0	0
76				22	0		-269	0	0	0
77				22	0		-268	0	0	0
78				22	0		-267	0	0	0
79				22	0		-266	0	0	0
80				22	0		-265	0	0	0
81				22	0		-264	0	0	0
82				22	0		-263	0	0	0
83				22	0		-262	0	0	0
84				22	0		-261	0	0	0
85				22	0		-260	0	0	0
86				22	0		-259	0	0	0
87				22	0		-258	0	0	0
88				22	0		-257	0	0	0
89				22	0		-256	0	0	0
90				22	0		-255	0	0	0
91				22	0		-254	0	0	0
92				22	0		-253	0	0	0
93				22	0		-252	0	0	0
94				22	0		-251	0	0	0
95				22	0		-250	0	0	0
96				22	0		-249	0	0	0
97				22	0		-248	0	0	0
98				22	0		-247	0	0	0
99				22	0		-246	0	0	0
100				22	0		-245	0	0	0
101				22	0		-244	0	0	0
102		CHH	1	22	4.54545		-243	0	0	4.54545
103				22	0		-242	0	0	0
104		CHH		22	0		-241	0	0	0
105		CHH	1	22	4.54545		-240	0	0	4.54545
106				22	0		-239	0	0	0
107				22	0		-238	0	0	0
108		CHH	1	22	4.54545		-237	0	0	4.54545
109				22	0		-236	0	0	0
110				22	0		-235	0	0	0
111				22	0		-234	0	0	0
112				22	0		-233	0	0	0
113				22	0		-232	0	0	0
114		CHH	1	22	4.54545		-231	0	0	4.54545
115		CHH		22	0		-230	0	0	0
116				22	0		-229	0	0	0
117				22	0		-228	0	0	0
118		CHH		22	0		-227	0	0	0
119				22	0		-226	0	0	0
120				22	0		-225	0	0	0
121				22	0		-224	0	0	0
122				22	0		-223	0	0	0
123		CG	1	22	4.54545		-222	4.54545	0	0
124				22	0		-221	0	0	0
125				22	0		-220	0	0	0
126				22	0		-219	0	0	0
127				22	0		-218	0	0	0
128				22	0		-217	0	0	0
129				22	0		-216	0	0	0
130				22	0		-215	0	0	0
131				22	0		-214	0	0	0
132				22	0		-213	0	0	0
133				22	0		-212	0	0	0
134				22	0		-211	0	0	0
135				22	0		-210	0	0	0
136				22	0		-209	0	0	0
137		CHH	1	22	4.54545		-208	0	0	4.54545
138		CHH	1	22	4.54545		-207	0	0	4.54545
139				22	0		-206	0	0	0
140				22	0		-205	0	0	0
141		CG	2	22	9.09091		-204	9.09091	0	0
142				22	0		-203	0	0	0
143				22	0		-202	0	0	0
144				22	0		-201	0	0	0
145				22	0		-200	0	0	0
146				22	0		-199	0	0	0
147				22	0		-198	0	0	0
148				22	0		-197	0	0	0
149				22	0		-196	0	0	0
150				22	0		-195	0	0	0
151				22	0		-194	0	0	0
152		CHH	1	22	4.54545		-193	0	0	4.54545
153		CHH	1	22	4.54545		-192	0	0	4.54545
154				22	0		-191	0	0	0
155		CHG		22	0		-190	0	0	0
156				22	0		-189	0	0	0
157				22	0		-188	0	0	0
158		CHG	1	22	4.54545		-187	0	4.54545	0
159		CG	2	22	9.09091		-186	9.09091	0	0
160				22	0		-185	0	0	0
161				22	0		-184	0	0	0
162		CHG	1	22	4.54545		-183	0	4.54545	0
163				22	0		-182	0	0	0
164				22	0		-181	0	0	0
165				22	0		-180	0	0	0
166				22	0		-179	0	0	0
167				22	0		-178	0	0	0
168				22	0		-177	0	0	0
169		CHH	1	22	4.54545		-176	0	0	4.54545
170		CHH	1	22	4.54545		-175	0	0	4.54545
171		CHH	1	22	4.54545		-174	0	0	4.54545
172				22	0		-173	0	0	0
173				22	0		-172	0	0	0
174				22	0		-171	0	0	0
175				22	0		-170	0	0	0
176				22	0		-169	0	0	0
177				22	0		-168	0	0	0
178				22	0		-167	0	0	0
179				22	0		-166	0	0	0
180				22	0		-165	0	0	0
181		CHH	1	22	4.54545		-164	0	0	4.54545
182		CHH	1	22	4.54545		-163	0	0	4.54545
183		CHH	1	22	4.54545		-162	0	0	4.54545
184		CHH	1	22	4.54545		-161	0	0	4.54545
185		CHH	1	22	4.54545		-160	0	0	4.54545
186				22	0		-159	0	0	0
187		CHH	1	22	4.54545		-158	0	0	4.54545
188		CHH	1	22	4.54545		-157	0	0	4.54545
189		CHH	2	22	9.09091		-156	0	0	9.09091
190				22	0		-155	0	0	0
191		CG		22	0		-154	0	0	0
192				22	0		-153	0	0	0
193				22	0		-152	0	0	0
194				22	0		-151	0	0	0
195				22	0		-150	0	0	0
196				22	0		-149	0	0	0
197				22	0		-148	0	0	0
198		CHH	1	22	4.54545		-147	0	0	4.54545
199				22	0		-146	0	0	0
200				22	0		-145	0	0	0
201		CG	2	22	9.09091		-144	9.09091	0	0
202				22	0		-143	0	0	0
203				22	0		-142	0	0	0
204				22	0		-141	0	0	0
205				22	0		-140	0	0	0
206				22	0		-139	0	0	0
207				22	0		-138	0	0	0
208				22	0		-137	0	0	0
209				22	0		-136	0	0	0
210				22	0		-135	0	0	0
211				22	0		-134	0	0	0
212				22	0		-133	0	0	0
213				22	0		-132	0	0	0
214				22	0		-131	0	0	0
215				22	0		-130	0	0	0
216		CG	1	22	4.54545		-129	4.54545	0	0
217				22	0		-128	0	0	0
218				22	0		-127	0	0	0
219				22	0		-126	0	0	0
220		CHH	1	22	4.54545		-125	0	0	4.54545
221		CHH	1	22	4.54545		-124	0	0	4.54545
222				22	0		-123	0	0	0
223				22	0		-122	0	0	0
224		CHH	1	22	4.54545		-121	0	0	4.54545
225		CHH	1	22	4.54545		-120	0	0	4.54545
226				22	0		-119	0	0	0
227		CG	2	22	9.09091		-118	9.09091	0	0
228				22	0		-117	0	0	0
229				22	0		-116	0	0	0
230		CHH	1	22	4.54545		-115	0	0	4.54545
231				22	0		-114	0	0	0
232				22	0		-113	0	0	0
233		CHH	1	22	4.54545		-112	0	0	4.54545
234				22	0		-111	0	0	0
235				22	0		-110	0	0	0
236				22	0		-109	0	0	0
237				22	0		-108	0	0	0
238		CHH	1	22	4.54545		-107	0	0	4.54545
239				22	0		-106	0	0	0
240				22	0		-105	0	0	0
241				22	0		-104	0	0	0
242				22	0		-103	0	0	0
243				22	0		-102	0	0	0
244				22	0		-101	0	0	0
245				22	0		-100	0	0	0
246				22	0		-99	0	0	0
247				22	0		-98	0	0	0
248				22	0		-97	0	0	0
249				22	0		-96	0	0	0
250				22	0		-95	0	0	0
251				22	0		-94	0	0	0
252				22	0		-93	0	0	0
253				22	0		-92	0	0	0
254				22	0		-91	0	0	0
255				22	0		-90	0	0	0
256				22	0		-89	0	0	0
257				22	0		-88	0	0	0
258		CHH	1	22	4.54545		-87	0	0	4.54545
259				22	0		-86	0	0	0
260		CHH	1	22	4.54545		-85	0	0	4.54545
261		CHH	1	22	4.54545		-84	0	0	4.54545
262				22	0		-83	0	0	0
263		CHG	2	22	9.09091		-82	0	9.09091	0
264				22	0		-81	0	0	0
265				22	0		-80	0	0	0
266				22	0		-79	0	0	0
267		CG	1	22	4.54545		-78	4.54545	0	0
268				22	0		-77	0	0	0
269				22	0		-76	0	0	0
270				22	0		-75	0	0	0
271				22	0		-74	0	0	0
272				22	0		-73	0	0	0
273				22	0		-72	0	0	0
274				22	0		-71	0	0	0
275				22	0		-70	0	0	0
276				22	0		-69	0	0	0
277				22	0		-68	0	0	0
278				22	0		-67	0	0	0
279		CG	1	22	4.54545		-66	4.54545	0	0
280				22	0		-65	0	0	0
281		CHH		22	0		-64	0	0	0
282				22	0		-63	0	0	0
283		CHH		22	0		-62	0	0	0
284				22	0		-61	0	0	0
285				22	0		-60	0	0	0
286				22	0		-59	0	0	0
287		CHH		22	0		-58	0	0	0
288		CHH		22	0		-57	0	0	0
289		CHH	1	22	4.54545		-56	0	0	4.54545
290				22	0		-55	0	0	0
291		CHH	1	22	4.54545		-54	0	0	4.54545
292				22	0		-53	0	0	0
293				22	0		-52	0	0	0
294				22	0		-51	0	0	0
295		CHH		22	0		-50	0	0	0
296		CHH		22	0		-49	0	0	0
297				22	0		-48	0	0	0
298				22	0		-47	0	0	0
299		CG	2	22	9.09091		-46	9.09091	0	0
300				22	0		-45	0	0	0
301		CHH		22	0		-44	0	0	0
302				22	0		-43	0	0	0
303				22	0		-42	0	0	0
304				22	0		-41	0	0	0
305				22	0		-40	0	0	0
306		CHH		22	0		-39	0	0	0
307		CHH		22	0		-38	0	0	0
308		CHH		22	0		-37	0	0	0
309				22	0		-36	0	0	0
310				22	0		-35	0	0	0
311		CHH		22	0		-34	0	0	0
312		CHH		22	0		-33	0	0	0
313				22	0		-32	0	0	0
314		CHH	1	22	4.54545		-31	0	0	4.54545
315				22	0		-30	0	0	0
316				22	0		-29	0	0	0
317				22	0		-28	0	0	0
318				22	0		-27	0	0	0
319				22	0		-26	0	0	0
320				22	0		-25	0	0	0
321				22	0		-24	0	0	0
322				22	0		-23	0	0	0
323				22	0		-22	0	0	0
324				22	0		-21	0	0	0
325				22	0		-20	0	0	0
326				22	0		-19	0	0	0
327				22	0		-18	0	0	0
328				22	0		-17	0	0	0
329		CHH		22	0		-16	0	0	0
330				22	0		-15	0	0	0
331				22	0		-14	0	0	0
332				22	0		-13	0	0	0
333				22	0		-12	0	0	0
334		CHH		22	0		-11	0	0	0
335				22	0		-10	0	0	0
336				22	0		-9	0	0	0
337				22	0		-8	0	0	0
338				22	0		-7	0	0	0
339				22	0		-6	0	0	0
340				22	0		-5	0	0	0
341				22	0		-4	0	0	0
342				22	0		-3	0	0	0
343				22	0		-2	0	0	0
344				22	0		-1	0	0	0

## Sheet: S1 345 Fig.3b
N=	24
		types	Cme	# samples	% methylation			CG	CHG	CHH
1			0	24	0		-344	0	0	0			# sites	Cme	%
2			0	24	0		-343	0	0	0		CHH	1536	487	31.7057
3			0	24	0		-342	0	0	0		CHG	168	114	67.8571
4			0	24	0		-341	0	0	0		CG	288	187	64.9306
5			0	24	0		-340	0	0	0		Total	1992	788	39.5582
6			0	24	0		-339	0	0	0
7			0	24	0		-338	0	0	0
8		CHH	0	24	0		-337	0	0	0
9			0	24	0		-336	0	0	0
10			0	24	0		-335	0	0	0
11			0	24	0		-334	0	0	0
12			0	24	0		-333	0	0	0
13		CHH	0	24	0		-332	0	0	0
14			0	24	0		-331	0	0	0
15			0	24	0		-330	0	0	0
16		CHH	0	24	0		-329	0	0	0
17			0	24	0		-328	0	0	0
18			0	24	0		-327	0	0	0
19			0	24	0		-326	0	0	0
20			0	24	0		-325	0	0	0
21			0	24	0		-324	0	0	0
22			0	24	0		-323	0	0	0
23			0	24	0		-322	0	0	0
24			0	24	0		-321	0	0	0
25			0	24	0		-320	0	0	0
26			0	24	0		-319	0	0	0
27			0	24	0		-318	0	0	0
28			0	24	0		-317	0	0	0
29		CHG	11	24	45.8333		-316	0	45.8333	0
30		CG	8	24	33.3333		-315	33.3333	0	0
31			0	24	0		-314	0	0	0
32			0	24	0		-313	0	0	0
33			0	24	0		-312	0	0	0
34			0	24	0		-311	0	0	0
35			0	24	0		-310	0	0	0
36		CHH	4	24	16.6667		-309	0	0	16.6667
37		CHH	0	24	0		-308	0	0	0
38			0	24	0		-307	0	0	0
39		CHH	1	24	4.16667		-306	0	0	4.16667
40		CHH	0	24	0		-305	0	0	0
41			0	24	0		-304	0	0	0
42		CG	6	24	25		-303	25	0	0
43			0	24	0		-302	0	0	0
44			0	24	0		-301	0	0	0
45			0	24	0		-300	0	0	0
46			0	24	0		-299	0	0	0
47			0	24	0		-298	0	0	0
48		CHH	12	24	50		-297	0	0	50
49		CHH	0	24	0		-296	0	0	0
50			0	24	0		-295	0	0	0
51			0	24	0		-294	0	0	0
52			0	24	0		-293	0	0	0
53			0	24	0		-292	0	0	0
54		CHH	0	24	0		-291	0	0	0
55		CHH	0	24	0		-290	0	0	0
56		CHG	8	24	33.3333		-289	0	33.3333	0
57			0	24	0		-288	0	0	0
58			0	24	0		-287	0	0	0
59		CHH	5	24	20.8333		-286	0	0	20.8333
60			0	24	0		-285	0	0	0
61			0	24	0		-284	0	0	0
62			0	24	0		-283	0	0	0
63		CHG	8	24	33.3333		-282	0	33.3333	0
64			0	24	0		-281	0	0	0
65			0	24	0		-280	0	0	0
66			0	24	0		-279	0	0	0
67		CHH	3	24	12.5		-278	0	0	12.5
68			0	24	0		-277	0	0	0
69		CHH	1	24	4.16667		-276	0	0	4.16667
70			0	24	0		-275	0	0	0
71			0	24	0		-274	0	0	0
72			0	24	0		-273	0	0	0
73			0	24	0		-272	0	0	0
74			0	24	0		-271	0	0	0
75			0	24	0		-270	0	0	0
76			0	24	0		-269	0	0	0
77			0	24	0		-268	0	0	0
78			0	24	0		-267	0	0	0
79			0	24	0		-266	0	0	0
80			0	24	0		-265	0	0	0
81			0	24	0		-264	0	0	0
82			0	24	0		-263	0	0	0
83			0	24	0		-262	0	0	0
84			0	24	0		-261	0	0	0
85			0	24	0		-260	0	0	0
86			0	24	0		-259	0	0	0
87			0	24	0		-258	0	0	0
88			0	24	0		-257	0	0	0
89			0	24	0		-256	0	0	0
90			0	24	0		-255	0	0	0
91			0	24	0		-254	0	0	0
92			0	24	0		-253	0	0	0
93			0	24	0		-252	0	0	0
94			0	24	0		-251	0	0	0
95			0	24	0		-250	0	0	0
96			0	24	0		-249	0	0	0
97			0	24	0		-248	0	0	0
98			0	24	0		-247	0	0	0
99			0	24	0		-246	0	0	0
100			0	24	0		-245	0	0	0
101			0	24	0		-244	0	0	0
102		CHH	12	24	50		-243	0	0	50
103			0	24	0		-242	0	0	0
104		CHH	1	24	4.16667		-241	0	0	4.16667
105		CHH	3	24	12.5		-240	0	0	12.5
106			0	24	0		-239	0	0	0
107			0	24	0		-238	0	0	0
108		CHH	0	24	0		-237	0	0	0
109			0	24	0		-236	0	0	0
110			0	24	0		-235	0	0	0
111			0	24	0		-234	0	0	0
112			0	24	0		-233	0	0	0
113			0	24	0		-232	0	0	0
114		CHH	0	24	0		-231	0	0	0
115		CHH	1	24	4.16667		-230	0	0	4.16667
116			0	24	0		-229	0	0	0
117			0	24	0		-228	0	0	0
118		CHH	2	24	8.33333		-227	0	0	8.33333
119			0	24	0		-226	0	0	0
120			0	24	0		-225	0	0	0
121			0	24	0		-224	0	0	0
122			0	24	0		-223	0	0	0
123		CG	8	24	33.3333		-222	33.3333	0	0
124			0	24	0		-221	0	0	0
125			0	24	0		-220	0	0	0
126			0	24	0		-219	0	0	0
127			0	24	0		-218	0	0	0
128			0	24	0		-217	0	0	0
129			0	24	0		-216	0	0	0
130			0	24	0		-215	0	0	0
131			0	24	0		-214	0	0	0
132			0	24	0		-213	0	0	0
133			0	24	0		-212	0	0	0
134			0	24	0		-211	0	0	0
135			0	24	0		-210	0	0	0
136			0	24	0		-209	0	0	0
137		CHH	12	24	50		-208	0	0	50
138		CHH	12	24	50		-207	0	0	50
139			0	24	0		-206	0	0	0
140			0	24	0		-205	0	0	0
141		CG	21	24	87.5		-204	87.5	0	0
142			0	24	0		-203	0	0	0
143			0	24	0		-202	0	0	0
144			0	24	0		-201	0	0	0
145			0	24	0		-200	0	0	0
146			0	24	0		-199	0	0	0
147			0	24	0		-198	0	0	0
148			0	24	0		-197	0	0	0
149			0	24	0		-196	0	0	0
150			0	24	0		-195	0	0	0
151			0	24	0		-194	0	0	0
152		CHH	17	24	70.8333		-193	0	0	70.8333
153		CHH	13	24	54.1667		-192	0	0	54.1667
154			0	24	0		-191	0	0	0
155		CHG	19	24	79.1667		-190	0	79.1667	0
156			0	24	0		-189	0	0	0
157			0	24	0		-188	0	0	0
158		CHG	22	24	91.6667		-187	0	91.6667	0
159		CG	24	24	100		-186	100	0	0
160			0	24	0		-185	0	0	0
161			0	24	0		-184	0	0	0
162		CHG	24	24	100		-183	0	100	0
163			0	24	0		-182	0	0	0
164			0	24	0		-181	0	0	0
165			0	24	0		-180	0	0	0
166			0	24	0		-179	0	0	0
167			0	24	0		-178	0	0	0
168			0	24	0		-177	0	0	0
169		CHH	16	24	66.6667		-176	0	0	66.6667
170		CHH	16	24	66.6667		-175	0	0	66.6667
171		CHH	19	24	79.1667		-174	0	0	79.1667
172			0	24	0		-173	0	0	0
173			0	24	0		-172	0	0	0
174			0	24	0		-171	0	0	0
175			0	24	0		-170	0	0	0
176			0	24	0		-169	0	0	0
177			0	24	0		-168	0	0	0
178			0	24	0		-167	0	0	0
179			0	24	0		-166	0	0	0
180			0	24	0		-165	0	0	0
181		CHH	16	24	66.6667		-164	0	0	66.6667
182		CHH	17	24	70.8333		-163	0	0	70.8333
183		CHH	16	24	66.6667		-162	0	0	66.6667
184		CHH	18	24	75		-161	0	0	75
185		CHH	22	24	91.6667		-160	0	0	91.6667
186			0	24	0		-159	0	0	0
187		CHH	16	24	66.6667		-158	0	0	66.6667
188		CHH	16	24	66.6667		-157	0	0	66.6667
189		CHH	18	24	75		-156	0	0	75
190			0	24	0		-155	0	0	0
191		CG	11	24	45.8333		-154	45.8333	0	0
192			0	24	0		-153	0	0	0
193			0	24	0		-152	0	0	0
194			0	24	0		-151	0	0	0
195			0	24	0		-150	0	0	0
196			0	24	0		-149	0	0	0
197			0	24	0		-148	0	0	0
198		CHH	19	24	79.1667		-147	0	0	79.1667
199			0	24	0		-146	0	0	0
200			0	24	0		-145	0	0	0
201		CG	24	24	100		-144	100	0	0
202			0	24	0		-143	0	0	0
203			0	24	0		-142	0	0	0
204			0	24	0		-141	0	0	0
205			0	24	0		-140	0	0	0
206			0	24	0		-139	0	0	0
207			0	24	0		-138	0	0	0
208			0	24	0		-137	0	0	0
209			0	24	0		-136	0	0	0
210			0	24	0		-135	0	0	0
211			0	24	0		-134	0	0	0
212			0	24	0		-133	0	0	0
213			0	24	0		-132	0	0	0
214			0	24	0		-131	0	0	0
215			0	24	0		-130	0	0	0
216		CG	24	24	100		-129	100	0	0
217			0	24	0		-128	0	0	0
218			0	24	0		-127	0	0	0
219			0	24	0		-126	0	0	0
220		CHH	17	24	70.8333		-125	0	0	70.8333
221		CHH	17	24	70.8333		-124	0	0	70.8333
222			0	24	0		-123	0	0	0
223			0	24	0		-122	0	0	0
224		CHH	17	24	70.8333		-121	0	0	70.8333
225		CHH	17	24	70.8333		-120	0	0	70.8333
226			0	24	0		-119	0	0	0
227		CG	24	24	100		-118	100	0	0
228			0	24	0		-117	0	0	0
229			0	24	0		-116	0	0	0
230		CHH	18	24	75		-115	0	0	75
231			0	24	0		-114	0	0	0
232			0	24	0		-113	0	0	0
233		CHH	15	24	62.5		-112	0	0	62.5
234			0	24	0		-111	0	0	0
235			0	24	0		-110	0	0	0
236			0	24	0		-109	0	0	0
237			0	24	0		-108	0	0	0
238		CHH	14	24	58.3333		-107	0	0	58.3333
239			0	24	0		-106	0	0	0
240			0	24	0		-105	0	0	0
241			0	24	0		-104	0	0	0
242			0	24	0		-103	0	0	0
243			0	24	0		-102	0	0	0
244			0	24	0		-101	0	0	0
245			0	24	0		-100	0	0	0
246			0	24	0		-99	0	0	0
247			0	24	0		-98	0	0	0
248			0	24	0		-97	0	0	0
249			0	24	0		-96	0	0	0
250			0	24	0		-95	0	0	0
251			0	24	0		-94	0	0	0
252			0	24	0		-93	0	0	0
253			0	24	0		-92	0	0	0
254			0	24	0		-91	0	0	0
255			0	24	0		-90	0	0	0
256			0	24	0		-89	0	0	0
257			0	24	0		-88	0	0	0
258		CHH	14	24	58.3333		-87	0	0	58.3333
259			0	24	0		-86	0	0	0
260		CHH	14	24	58.3333		-85	0	0	58.3333
261		CHH	14	24	58.3333		-84	0	0	58.3333
262			0	24	0		-83	0	0	0
263		CHG	22	24	91.6667		-82	0	91.6667	0
264			0	24	0		-81	0	0	0
265			0	24	0		-80	0	0	0
266			0	24	0		-79	0	0	0
267		CG	8	24	33.3333		-78	33.3333	0	0
268			0	24	0		-77	0	0	0
269			0	24	0		-76	0	0	0
270			0	24	0		-75	0	0	0
271			0	24	0		-74	0	0	0
272			0	24	0		-73	0	0	0
273			0	24	0		-72	0	0	0
274			0	24	0		-71	0	0	0
275			0	24	0		-70	0	0	0
276			0	24	0		-69	0	0	0
277			0	24	0		-68	0	0	0
278			0	24	0		-67	0	0	0
279		CG	8	24	33.3333		-66	33.3333	0	0
280			0	24	0		-65	0	0	0
281		CHH	0	24	0		-64	0	0	0
282			0	24	0		-63	0	0	0
283		CHH	2	24	8.33333		-62	0	0	8.33333
284			0	24	0		-61	0	0	0
285			0	24	0		-60	0	0	0
286			0	24	0		-59	0	0	0
287		CHH	1	24	4.16667		-58	0	0	4.16667
288		CHH	0	24	0		-57	0	0	0
289		CHH	14	24	58.3333		-56	0	0	58.3333
290			0	24	0		-55	0	0	0
291		CHH	1	24	4.16667		-54	0	0	4.16667
292			0	24	0		-53	0	0	0
293			0	24	0		-52	0	0	0
294			0	24	0		-51	0	0	0
295		CHH	1	24	4.16667		-50	0	0	4.16667
296		CHH	0	24	0		-49	0	0	0
297			0	24	0		-48	0	0	0
298			0	24	0		-47	0	0	0
299		CG	21	24	87.5		-46	87.5	0	0
300			0	24	0		-45	0	0	0
301		CHH	1	24	4.16667		-44	0	0	4.16667
302			0	24	0		-43	0	0	0
303			0	24	0		-42	0	0	0
304			0	24	0		-41	0	0	0
305			0	24	0		-40	0	0	0
306		CHH	0	24	0		-39	0	0	0
307		CHH	0	24	0		-38	0	0	0
308		CHH	0	24	0		-37	0	0	0
309			0	24	0		-36	0	0	0
310			0	24	0		-35	0	0	0
311		CHH	0	24	0		-34	0	0	0
312		CHH	0	24	0		-33	0	0	0
313			0	24	0		-32	0	0	0
314		CHH	2	24	8.33333		-31	0	0	8.33333
315			0	24	0		-30	0	0	0
316			0	24	0		-29	0	0	0
317			0	24	0		-28	0	0	0
318			0	24	0		-27	0	0	0
319			0	24	0		-26	0	0	0
320			0	24	0		-25	0	0	0
321			0	24	0		-24	0	0	0
322			0	24	0		-23	0	0	0
323			0	24	0		-22	0	0	0
324			0	24	0		-21	0	0	0
325			0	24	0		-20	0	0	0
326			0	24	0		-19	0	0	0
327			0	24	0		-18	0	0	0
328			0	24	0		-17	0	0	0
329		CHH	0	24	0		-16	0	0	0
330			0	24	0		-15	0	0	0
331			0	24	0		-14	0	0	0
332			0	24	0		-13	0	0	0
333			0	24	0		-12	0	0	0
334		CHH	0	24	0		-11	0	0	0
335			0	24	0		-10	0	0	0
336			0	24	0		-9	0	0	0
337			0	24	0		-8	0	0	0
338			0	24	0		-7	0	0	0
339			0	24	0		-6	0	0	0
340			0	24	0		-5	0	0	0
341			0	24	0		-4	0	0	0
342			0	24	0		-3	0	0	0
343			0	24	0		-2	0	0	0
344			0	24	0		-1	0	0	0

## Sheet: S1 208 ORN Fig.3c
N=	24
		types	Cme	# samples	% methylation			CG	CHG	CHH
1			0	24	0		-344	0	0	0			# sites	Cme	%
2			0	24	0		-343	0	0	0		CHH	1536	309	20.1172
3			0	24	0		-342	0	0	0		CHG	168	66	39.2857
4			0	24	0		-341	0	0	0		CG	288	98	34.0278
5			0	24	0		-340	0	0	0		Total	1992	473	23.745
6			0	24	0		-339	0	0	0
7			0	24	0		-338	0	0	0
8		CHH	0	24	0		-337	0	0	0
9			0	24	0		-336	0	0	0
10			0	24	0		-335	0	0	0
11			0	24	0		-334	0	0	0
12			0	24	0		-333	0	0	0
13		CHH	0	24	0		-332	0	0	0
14			0	24	0		-331	0	0	0
15			0	24	0		-330	0	0	0
16		CHH	0	24	0		-329	0	0	0
17			0	24	0		-328	0	0	0
18			0	24	0		-327	0	0	0
19			0	24	0		-326	0	0	0
20			0	24	0		-325	0	0	0
21			0	24	0		-324	0	0	0
22			0	24	0		-323	0	0	0
23			0	24	0		-322	0	0	0
24			0	24	0		-321	0	0	0
25			0	24	0		-320	0	0	0
26			0	24	0		-319	0	0	0
27			0	24	0		-318	0	0	0
28			0	24	0		-317	0	0	0
29		CHG	11	24	45.8333		-316	0	45.8333	0
30		CG	8	24	33.3333		-315	33.3333	0	0
31			0	24	0		-314	0	0	0
32			0	24	0		-313	0	0	0
33			0	24	0		-312	0	0	0
34			0	24	0		-311	0	0	0
35			0	24	0		-310	0	0	0
36		CHH	4	24	16.6667		-309	0	0	16.6667
37		CHH	4	24	16.6667		-308	0	0	16.6667
38			0	24	0		-307	0	0	0
39		CHH	5	24	20.8333		-306	0	0	20.8333
40		CHH	6	24	25		-305	0	0	25
41			0	24	0		-304	0	0	0
42		CG	9	24	37.5		-303	37.5	0	0
43			0	24	0		-302	0	0	0
44			0	24	0		-301	0	0	0
45			0	24	0		-300	0	0	0
46			0	24	0		-299	0	0	0
47			0	24	0		-298	0	0	0
48		CHH	11	24	45.8333		-297	0	0	45.8333
49		CHH	4	24	16.6667		-296	0	0	16.6667
50			0	24	0		-295	0	0	0
51			0	24	0		-294	0	0	0
52			0	24	0		-293	0	0	0
53			0	24	0		-292	0	0	0
54		CHH	1	24	4.16667		-291	0	0	4.16667
55		CHH	2	24	8.33333		-290	0	0	8.33333
56		CHG	6	24	25		-289	0	25	0
57			0	24	0		-288	0	0	0
58			0	24	0		-287	0	0	0
59		CHH	2	24	8.33333		-286	0	0	8.33333
60			0	24	0		-285	0	0	0
61			0	24	0		-284	0	0	0
62			0	24	0		-283	0	0	0
63		CHG	5	24	20.8333		-282	0	20.8333	0
64			0	24	0		-281	0	0	0
65			0	24	0		-280	0	0	0
66			0	24	0		-279	0	0	0
67		CHH	4	24	16.6667		-278	0	0	16.6667
68			0	24	0		-277	0	0	0
69		CHH	2	24	8.33333		-276	0	0	8.33333
70			0	24	0		-275	0	0	0
71			0	24	0		-274	0	0	0
72			0	24	0		-273	0	0	0
73			0	24	0		-272	0	0	0
74			0	24	0		-271	0	0	0
75			0	24	0		-270	0	0	0
76			0	24	0		-269	0	0	0
77			0	24	0		-268	0	0	0
78			0	24	0		-267	0	0	0
79			0	24	0		-266	0	0	0
80			0	24	0		-265	0	0	0
81			0	24	0		-264	0	0	0
82			0	24	0		-263	0	0	0
83			0	24	0		-262	0	0	0
84			0	24	0		-261	0	0	0
85			0	24	0		-260	0	0	0
86			0	24	0		-259	0	0	0
87			0	24	0		-258	0	0	0
88			0	24	0		-257	0	0	0
89			0	24	0		-256	0	0	0
90			0	24	0		-255	0	0	0
91			0	24	0		-254	0	0	0
92			0	24	0		-253	0	0	0
93			0	24	0		-252	0	0	0
94			0	24	0		-251	0	0	0
95			0	24	0		-250	0	0	0
96			0	24	0		-249	0	0	0
97			0	24	0		-248	0	0	0
98			0	24	0		-247	0	0	0
99			0	24	0		-246	0	0	0
100			0	24	0		-245	0	0	0
101			0	24	0		-244	0	0	0
102		CHH	10	24	41.6667		-243	0	0	41.6667
103			0	24	0		-242	0	0	0
104		CHH	3	24	12.5		-241	0	0	12.5
105		CHH	3	24	12.5		-240	0	0	12.5
106			0	24	0		-239	0	0	0
107			0	24	0		-238	0	0	0
108		CHH	2	24	8.33333		-237	0	0	8.33333
109			0	24	0		-236	0	0	0
110			0	24	0		-235	0	0	0
111			0	24	0		-234	0	0	0
112			0	24	0		-233	0	0	0
113			0	24	0		-232	0	0	0
114		CHH	3	24	12.5		-231	0	0	12.5
115		CHH	3	24	12.5		-230	0	0	12.5
116			0	24	0		-229	0	0	0
117			0	24	0		-228	0	0	0
118		CHH	7	24	29.1667		-227	0	0	29.1667
119			0	24	0		-226	0	0	0
120			0	24	0		-225	0	0	0
121			0	24	0		-224	0	0	0
122			0	24	0		-223	0	0	0
123		CG	8	24	33.3333		-222	33.3333	0	0
124			0	24	0		-221	0	0	0
125			0	24	0		-220	0	0	0
126			0	24	0		-219	0	0	0
127			0	24	0		-218	0	0	0
128			0	24	0		-217	0	0	0
129			0	24	0		-216	0	0	0
130			0	24	0		-215	0	0	0
131			0	24	0		-214	0	0	0
132			0	24	0		-213	0	0	0
133			0	24	0		-212	0	0	0
134			0	24	0		-211	0	0	0
135			0	24	0		-210	0	0	0
136			0	24	0		-209	0	0	0
137		CHH	11	24	45.8333		-208	0	0	45.8333
138		CHH	13	24	54.1667		-207	0	0	54.1667
139			0	24	0		-206	0	0	0
140			0	24	0		-205	0	0	0
141		CG	5	24	20.8333		-204	20.8333	0	0
142			0	24	0		-203	0	0	0
143			0	24	0		-202	0	0	0
144			0	24	0		-201	0	0	0
145			0	24	0		-200	0	0	0
146			0	24	0		-199	0	0	0
147			0	24	0		-198	0	0	0
148			0	24	0		-197	0	0	0
149			0	24	0		-196	0	0	0
150			0	24	0		-195	0	0	0
151			0	24	0		-194	0	0	0
152		CHH	9	24	37.5		-193	0	0	37.5
153		CHH	7	24	29.1667		-192	0	0	29.1667
154			0	24	0		-191	0	0	0
155		CHG	10	24	41.6667		-190	0	41.6667	0
156			0	24	0		-189	0	0	0
157			0	24	0		-188	0	0	0
158		CHG	11	24	45.8333		-187	0	45.8333	0
159		CG	14	24	58.3333		-186	58.3333	0	0
160			0	24	0		-185	0	0	0
161			0	24	0		-184	0	0	0
162		CHG	13	24	54.1667		-183	0	54.1667	0
163			0	24	0		-182	0	0	0
164			0	24	0		-181	0	0	0
165			0	24	0		-180	0	0	0
166			0	24	0		-179	0	0	0
167			0	24	0		-178	0	0	0
168			0	24	0		-177	0	0	0
169		CHH	12	24	50		-176	0	0	50
170		CHH	9	24	37.5		-175	0	0	37.5
171		CHH	7	24	29.1667		-174	0	0	29.1667
172			0	24	0		-173	0	0	0
173			0	24	0		-172	0	0	0
174			0	24	0		-171	0	0	0
175			0	24	0		-170	0	0	0
176			0	24	0		-169	0	0	0
177			0	24	0		-168	0	0	0
178			0	24	0		-167	0	0	0
179			0	24	0		-166	0	0	0
180			0	24	0		-165	0	0	0
181		CHH	7	24	29.1667		-164	0	0	29.1667
182		CHH	7	24	29.1667		-163	0	0	29.1667
183		CHH	8	24	33.3333		-162	0	0	33.3333
184		CHH	8	24	33.3333		-161	0	0	33.3333
185		CHH	7	24	29.1667		-160	0	0	29.1667
186			0	24	0		-159	0	0	0
187		CHH	7	24	29.1667		-158	0	0	29.1667
188		CHH	7	24	29.1667		-157	0	0	29.1667
189		CHH	9	24	37.5		-156	0	0	37.5
190			0	24	0		-155	0	0	0
191		CG	7	24	29.1667		-154	29.1667	0	0
192			0	24	0		-153	0	0	0
193			0	24	0		-152	0	0	0
194			0	24	0		-151	0	0	0
195			0	24	0		-150	0	0	0
196			0	24	0		-149	0	0	0
197			0	24	0		-148	0	0	0
198		CHH	9	24	37.5		-147	0	0	37.5
199			0	24	0		-146	0	0	0
200			0	24	0		-145	0	0	0
201		CG	11	24	45.8333		-144	45.8333	0	0
202			0	24	0		-143	0	0	0
203			0	24	0		-142	0	0	0
204			0	24	0		-141	0	0	0
205			0	24	0		-140	0	0	0
206			0	24	0		-139	0	0	0
207			0	24	0		-138	0	0	0
208			0	24	0		-137	0	0	0
209			0	24	0		-136	0	0	0
210			0	24	0		-135	0	0	0
211			0	24	0		-134	0	0	0
212			0	24	0		-133	0	0	0
213			0	24	0		-132	0	0	0
214			0	24	0		-131	0	0	0
215			0	24	0		-130	0	0	0
216		CG	8	24	33.3333		-129	33.3333	0	0
217			0	24	0		-128	0	0	0
218			0	24	0		-127	0	0	0
219			0	24	0		-126	0	0	0
220		CHH	8	24	33.3333		-125	0	0	33.3333
221		CHH	7	24	29.1667		-124	0	0	29.1667
222			0	24	0		-123	0	0	0
223			0	24	0		-122	0	0	0
224		CHH	8	24	33.3333		-121	0	0	33.3333
225		CHH	7	24	29.1667		-120	0	0	29.1667
226			0	24	0		-119	0	0	0
227		CG	9	24	37.5		-118	37.5	0	0
228			0	24	0		-117	0	0	0
229			0	24	0		-116	0	0	0
230		CHH	10	24	41.6667		-115	0	0	41.6667
231			0	24	0		-114	0	0	0
232			0	24	0		-113	0	0	0
233		CHH	9	24	37.5		-112	0	0	37.5
234			0	24	0		-111	0	0	0
235			0	24	0		-110	0	0	0
236			0	24	0		-109	0	0	0
237			0	24	0		-108	0	0	0
238		CHH	7	24	29.1667		-107	0	0	29.1667
239			0	24	0		-106	0	0	0
240			0	24	0		-105	0	0	0
241			0	24	0		-104	0	0	0
242			0	24	0		-103	0	0	0
243			0	24	0		-102	0	0	0
244			0	24	0		-101	0	0	0
245			0	24	0		-100	0	0	0
246			0	24	0		-99	0	0	0
247			0	24	0		-98	0	0	0
248			0	24	0		-97	0	0	0
249			0	24	0		-96	0	0	0
250			0	24	0		-95	0	0	0
251			0	24	0		-94	0	0	0
252			0	24	0		-93	0	0	0
253			0	24	0		-92	0	0	0
254			0	24	0		-91	0	0	0
255			0	24	0		-90	0	0	0
256			0	24	0		-89	0	0	0
257			0	24	0		-88	0	0	0
258		CHH	7	24	29.1667		-87	0	0	29.1667
259			0	24	0		-86	0	0	0
260		CHH	7	24	29.1667		-85	0	0	29.1667
261		CHH	3	24	12.5		-84	0	0	12.5
262			0	24	0		-83	0	0	0
263		CHG	10	24	41.6667		-82	0	41.6667	0
264			0	24	0		-81	0	0	0
265			0	24	0		-80	0	0	0
266			0	24	0		-79	0	0	0
267		CG	8	24	33.3333		-78	33.3333	0	0
268			0	24	0		-77	0	0	0
269			0	24	0		-76	0	0	0
270			0	24	0		-75	0	0	0
271			0	24	0		-74	0	0	0
272			0	24	0		-73	0	0	0
273			0	24	0		-72	0	0	0
274			0	24	0		-71	0	0	0
275			0	24	0		-70	0	0	0
276			0	24	0		-69	0	0	0
277			0	24	0		-68	0	0	0
278			0	24	0		-67	0	0	0
279		CG	3	24	12.5		-66	12.5	0	0
280			0	24	0		-65	0	0	0
281		CHH	2	24	8.33333		-64	0	0	8.33333
282			0	24	0		-63	0	0	0
283		CHH	0	24	0		-62	0	0	0
284			0	24	0		-61	0	0	0
285			0	24	0		-60	0	0	0
286			0	24	0		-59	0	0	0
287		CHH	1	24	4.16667		-58	0	0	4.16667
288		CHH	2	24	8.33333		-57	0	0	8.33333
289		CHH	7	24	29.1667		-56	0	0	29.1667
290			0	24	0		-55	0	0	0
291		CHH	0	24	0		-54	0	0	0
292			0	24	0		-53	0	0	0
293			0	24	0		-52	0	0	0
294			0	24	0		-51	0	0	0
295		CHH	0	24	0		-50	0	0	0
296		CHH	0	24	0		-49	0	0	0
297			0	24	0		-48	0	0	0
298			0	24	0		-47	0	0	0
299		CG	8	24	33.3333		-46	33.3333	0	0
300			0	24	0		-45	0	0	0
301		CHH	0	24	0		-44	0	0	0
302			0	24	0		-43	0	0	0
303			0	24	0		-42	0	0	0
304			0	24	0		-41	0	0	0
305			0	24	0		-40	0	0	0
306		CHH	2	24	8.33333		-39	0	0	8.33333
307		CHH	2	24	8.33333		-38	0	0	8.33333
308		CHH	0	24	0		-37	0	0	0
309			0	24	0		-36	0	0	0
310			0	24	0		-35	0	0	0
311		CHH	1	24	4.16667		-34	0	0	4.16667
312		CHH	4	24	16.6667		-33	0	0	16.6667
313			0	24	0		-32	0	0	0
314		CHH	2	24	8.33333		-31	0	0	8.33333
315			0	24	0		-30	0	0	0
316			0	24	0		-29	0	0	0
317			0	24	0		-28	0	0	0
318			0	24	0		-27	0	0	0
319			0	24	0		-26	0	0	0
320			0	24	0		-25	0	0	0
321			0	24	0		-24	0	0	0
322			0	24	0		-23	0	0	0
323			0	24	0		-22	0	0	0
324			0	24	0		-21	0	0	0
325			0	24	0		-20	0	0	0
326			0	24	0		-19	0	0	0
327			0	24	0		-18	0	0	0
328			0	24	0		-17	0	0	0
329		CHH	0	24	0		-16	0	0	0
330			0	24	0		-15	0	0	0
331			0	24	0		-14	0	0	0
332			0	24	0		-13	0	0	0
333			0	24	0		-12	0	0	0
334		CHH	0	24	0		-11	0	0	0
335			0	24	0		-10	0	0	0
336			0	24	0		-9	0	0	0
337			0	24	0		-8	0	0	0
338			0	24	0		-7	0	0	0
339			0	24	0		-6	0	0	0
340			0	24	0		-5	0	0	0
341			0	24	0		-4	0	0	0
342			0	24	0		-3	0	0	0
343			0	24	0		-2	0	0	0
344			0	24	0		-1	0	0	0

## Sheet: 16C(Vein) plus Fig.S1
N=	24
		types	Cme	# samples	% methylation			CG	CHG	CHH
1				24	0		-344	0	0	0			# sites	Cme	%
2				24	0		-343	0	0	0		CHH	1536	47	3.0599		CHH	3.0599
3				24	0		-342	0	0	0		CHG	168	9	5.35714		CHG	5.35714
4				24	0		-341	0	0	0		CG	288	11	3.81944		CG	3.81944
5				24	0		-340	0	0	0		Total	1992	67	3.36345		Total	3.36345
6				24	0		-339	0	0	0
7				24	0		-338	0	0	0
8		CHH		24	0		-337	0	0	0
9				24	0		-336	0	0	0
10				24	0		-335	0	0	0
11				24	0		-334	0	0	0
12				24	0		-333	0	0	0
13		CHH		24	0		-332	0	0	0
14				24	0		-331	0	0	0
15				24	0		-330	0	0	0
16		CHH		24	0		-329	0	0	0
17				24	0		-328	0	0	0
18				24	0		-327	0	0	0
19				24	0		-326	0	0	0
20				24	0		-325	0	0	0
21				24	0		-324	0	0	0
22				24	0		-323	0	0	0
23				24	0		-322	0	0	0
24				24	0		-321	0	0	0
25				24	0		-320	0	0	0
26				24	0		-319	0	0	0
27				24	0		-318	0	0	0
28				24	0		-317	0	0	0
29		CHG		24	0		-316	0	0	0
30		CG	2	24	8.33333		-315	8.33333	0	0
31				24	0		-314	0	0	0
32				24	0		-313	0	0	0
33				24	0		-312	0	0	0
34				24	0		-311	0	0	0
35				24	0		-310	0	0	0
36		CHH		24	0		-309	0	0	0
37		CHH		24	0		-308	0	0	0
38				24	0		-307	0	0	0
39		CHH		24	0		-306	0	0	0
40		CHH		24	0		-305	0	0	0
41				24	0		-304	0	0	0
42		CG	2	24	8.33333		-303	8.33333	0	0
43				24	0		-302	0	0	0
44				24	0		-301	0	0	0
45				24	0		-300	0	0	0
46				24	0		-299	0	0	0
47				24	0		-298	0	0	0
48		CHH	1	24	4.16667		-297	0	0	4.16667
49		CHH	1	24	4.16667		-296	0	0	4.16667
50				24	0		-295	0	0	0
51				24	0		-294	0	0	0
52				24	0		-293	0	0	0
53				24	0		-292	0	0	0
54		CHH		24	0		-291	0	0	0
55		CHH		24	0		-290	0	0	0
56		CHG	1	24	4.16667		-289	0	4.16667	0
57				24	0		-288	0	0	0
58				24	0		-287	0	0	0
59		CHH		24	0		-286	0	0	0
60				24	0		-285	0	0	0
61				24	0		-284	0	0	0
62				24	0		-283	0	0	0
63		CHG	1	24	4.16667		-282	0	4.16667	0
64				24	0		-281	0	0	0
65				24	0		-280	0	0	0
66				24	0		-279	0	0	0
67		CHH	3	24	12.5		-278	0	0	12.5
68				24	0		-277	0	0	0
69		CHH		24	0		-276	0	0	0
70				24	0		-275	0	0	0
71				24	0		-274	0	0	0
72				24	0		-273	0	0	0
73				24	0		-272	0	0	0
74				24	0		-271	0	0	0
75				24	0		-270	0	0	0
76				24	0		-269	0	0	0
77				24	0		-268	0	0	0
78				24	0		-267	0	0	0
79				24	0		-266	0	0	0
80				24	0		-265	0	0	0
81				24	0		-264	0	0	0
82				24	0		-263	0	0	0
83				24	0		-262	0	0	0
84				24	0		-261	0	0	0
85				24	0		-260	0	0	0
86				24	0		-259	0	0	0
87				24	0		-258	0	0	0
88				24	0		-257	0	0	0
89				24	0		-256	0	0	0
90				24	0		-255	0	0	0
91				24	0		-254	0	0	0
92				24	0		-253	0	0	0
93				24	0		-252	0	0	0
94				24	0		-251	0	0	0
95				24	0		-250	0	0	0
96				24	0		-249	0	0	0
97				24	0		-248	0	0	0
98				24	0		-247	0	0	0
99				24	0		-246	0	0	0
100				24	0		-245	0	0	0
101				24	0		-244	0	0	0
102		CHH	2	24	8.33333		-243	0	0	8.33333
103				24	0		-242	0	0	0
104		CHH	1	24	4.16667		-241	0	0	4.16667
105		CHH	1	24	4.16667		-240	0	0	4.16667
106				24	0		-239	0	0	0
107				24	0		-238	0	0	0
108		CHH		24	0		-237	0	0	0
109				24	0		-236	0	0	0
110				24	0		-235	0	0	0
111				24	0		-234	0	0	0
112				24	0		-233	0	0	0
113				24	0		-232	0	0	0
114		CHH	1	24	4.16667		-231	0	0	4.16667
115		CHH	1	24	4.16667		-230	0	0	4.16667
116				24	0		-229	0	0	0
117				24	0		-228	0	0	0
118		CHH	2	24	8.33333		-227	0	0	8.33333
119				24	0		-226	0	0	0
120				24	0		-225	0	0	0
121				24	0		-224	0	0	0
122				24	0		-223	0	0	0
123		CG	1	24	4.16667		-222	4.16667	0	0
124				24	0		-221	0	0	0
125				24	0		-220	0	0	0
126				24	0		-219	0	0	0
127				24	0		-218	0	0	0
128				24	0		-217	0	0	0
129				24	0		-216	0	0	0
130				24	0		-215	0	0	0
131				24	0		-214	0	0	0
132				24	0		-213	0	0	0
133				24	0		-212	0	0	0
134				24	0		-211	0	0	0
135				24	0		-210	0	0	0
136				24	0		-209	0	0	0
137		CHH	2	24	8.33333		-208	0	0	8.33333
138		CHH	2	24	8.33333		-207	0	0	8.33333
139				24	0		-206	0	0	0
140				24	0		-205	0	0	0
141		CG	1	24	4.16667		-204	4.16667	0	0
142				24	0		-203	0	0	0
143				24	0		-202	0	0	0
144				24	0		-201	0	0	0
145				24	0		-200	0	0	0
146				24	0		-199	0	0	0
147				24	0		-198	0	0	0
148				24	0		-197	0	0	0
149				24	0		-196	0	0	0
150				24	0		-195	0	0	0
151				24	0		-194	0	0	0
152		CHH	1	24	4.16667		-193	0	0	4.16667
153		CHH	1	24	4.16667		-192	0	0	4.16667
154				24	0		-191	0	0	0
155		CHG	2	24	8.33333		-190	0	8.33333	0
156				24	0		-189	0	0	0
157				24	0		-188	0	0	0
158		CHG	2	24	8.33333		-187	0	8.33333	0
159		CG	1	24	4.16667		-186	4.16667	0	0
160				24	0		-185	0	0	0
161				24	0		-184	0	0	0
162		CHG	2	24	8.33333		-183	0	8.33333	0
163				24	0		-182	0	0	0
164				24	0		-181	0	0	0
165				24	0		-180	0	0	0
166				24	0		-179	0	0	0
167				24	0		-178	0	0	0
168				24	0		-177	0	0	0
169		CHH	2	24	8.33333		-176	0	0	8.33333
170		CHH	1	24	4.16667		-175	0	0	4.16667
171		CHH	1	24	4.16667		-174	0	0	4.16667
172				24	0		-173	0	0	0
173				24	0		-172	0	0	0
174				24	0		-171	0	0	0
175				24	0		-170	0	0	0
176				24	0		-169	0	0	0
177				24	0		-168	0	0	0
178				24	0		-167	0	0	0
179				24	0		-166	0	0	0
180				24	0		-165	0	0	0
181		CHH	1	24	4.16667		-164	0	0	4.16667
182		CHH	1	24	4.16667		-163	0	0	4.16667
183		CHH	1	24	4.16667		-162	0	0	4.16667
184		CHH	2	24	8.33333		-161	0	0	8.33333
185		CHH	2	24	8.33333		-160	0	0	8.33333
186				24	0		-159	0	0	0
187		CHH	1	24	4.16667		-158	0	0	4.16667
188		CHH	1	24	4.16667		-157	0	0	4.16667
189		CHH	1	24	4.16667		-156	0	0	4.16667
190				24	0		-155	0	0	0
191		CG		24	0		-154	0	0	0
192				24	0		-153	0	0	0
193				24	0		-152	0	0	0
194				24	0		-151	0	0	0
195				24	0		-150	0	0	0
196				24	0		-149	0	0	0
197				24	0		-148	0	0	0
198		CHH	1	24	4.16667		-147	0	0	4.16667
199				24	0		-146	0	0	0
200				24	0		-145	0	0	0
201		CG	1	24	4.16667		-144	4.16667	0	0
202				24	0		-143	0	0	0
203				24	0		-142	0	0	0
204				24	0		-141	0	0	0
205				24	0		-140	0	0	0
206				24	0		-139	0	0	0
207				24	0		-138	0	0	0
208				24	0		-137	0	0	0
209				24	0		-136	0	0	0
210				24	0		-135	0	0	0
211				24	0		-134	0	0	0
212				24	0		-133	0	0	0
213				24	0		-132	0	0	0
214				24	0		-131	0	0	0
215				24	0		-130	0	0	0
216		CG	1	24	4.16667		-129	4.16667	0	0
217				24	0		-128	0	0	0
218				24	0		-127	0	0	0
219				24	0		-126	0	0	0
220		CHH	1	24	4.16667		-125	0	0	4.16667
221		CHH	2	24	8.33333		-124	0	0	8.33333
222				24	0		-123	0	0	0
223				24	0		-122	0	0	0
224		CHH	1	24	4.16667		-121	0	0	4.16667
225		CHH	1	24	4.16667		-120	0	0	4.16667
226				24	0		-119	0	0	0
227		CG	1	24	4.16667		-118	4.16667	0	0
228				24	0		-117	0	0	0
229				24	0		-116	0	0	0
230		CHH	1	24	4.16667		-115	0	0	4.16667
231				24	0		-114	0	0	0
232				24	0		-113	0	0	0
233		CHH	1	24	4.16667		-112	0	0	4.16667
234				24	0		-111	0	0	0
235				24	0		-110	0	0	0
236				24	0		-109	0	0	0
237				24	0		-108	0	0	0
238		CHH	1	24	4.16667		-107	0	0	4.16667
239				24	0		-106	0	0	0
240				24	0		-105	0	0	0
241				24	0		-104	0	0	0
242				24	0		-103	0	0	0
243				24	0		-102	0	0	0
244				24	0		-101	0	0	0
245				24	0		-100	0	0	0
246				24	0		-99	0	0	0
247				24	0		-98	0	0	0
248				24	0		-97	0	0	0
249				24	0		-96	0	0	0
250				24	0		-95	0	0	0
251				24	0		-94	0	0	0
252				24	0		-93	0	0	0
253				24	0		-92	0	0	0
254				24	0		-91	0	0	0
255				24	0		-90	0	0	0
256				24	0		-89	0	0	0
257				24	0		-88	0	0	0
258		CHH	1	24	4.16667		-87	0	0	4.16667
259				24	0		-86	0	0	0
260		CHH	1	24	4.16667		-85	0	0	4.16667
261		CHH	1	24	4.16667		-84	0	0	4.16667
262				24	0		-83	0	0	0
263		CHG	1	24	4.16667		-82	0	4.16667	0
264				24	0		-81	0	0	0
265				24	0		-80	0	0	0
266				24	0		-79	0	0	0
267		CG		24	0		-78	0	0	0
268				24	0		-77	0	0	0
269				24	0		-76	0	0	0
270				24	0		-75	0	0	0
271				24	0		-74	0	0	0
272				24	0		-73	0	0	0
273				24	0		-72	0	0	0
274				24	0		-71	0	0	0
275				24	0		-70	0	0	0
276				24	0		-69	0	0	0
277				24	0		-68	0	0	0
278				24	0		-67	0	0	0
279		CG		24	0		-66	0	0	0
280				24	0		-65	0	0	0
281		CHH		24	0		-64	0	0	0
282				24	0		-63	0	0	0
283		CHH		24	0		-62	0	0	0
284				24	0		-61	0	0	0
285				24	0		-60	0	0	0
286				24	0		-59	0	0	0
287		CHH		24	0		-58	0	0	0
288		CHH		24	0		-57	0	0	0
289		CHH	1	24	4.16667		-56	0	0	4.16667
290				24	0		-55	0	0	0
291		CHH		24	0		-54	0	0	0
292				24	0		-53	0	0	0
293				24	0		-52	0	0	0
294				24	0		-51	0	0	0
295		CHH		24	0		-50	0	0	0
296		CHH		24	0		-49	0	0	0
297				24	0		-48	0	0	0
298				24	0		-47	0	0	0
299		CG	1	24	4.16667		-46	4.16667	0	0
300				24	0		-45	0	0	0
301		CHH		24	0		-44	0	0	0
302				24	0		-43	0	0	0
303				24	0		-42	0	0	0
304				24	0		-41	0	0	0
305				24	0		-40	0	0	0
306		CHH		24	0		-39	0	0	0
307		CHH		24	0		-38	0	0	0
308		CHH		24	0		-37	0	0	0
309				24	0		-36	0	0	0
310				24	0		-35	0	0	0
311		CHH	1	24	4.16667		-34	0	0	4.16667
312		CHH		24	0		-33	0	0	0
313				24	0		-32	0	0	0
314		CHH		24	0		-31	0	0	0
315				24	0		-30	0	0	0
316				24	0		-29	0	0	0
317				24	0		-28	0	0	0
318				24	0		-27	0	0	0
319				24	0		-26	0	0	0
320				24	0		-25	0	0	0
321				24	0		-24	0	0	0
322				24	0		-23	0	0	0
323				24	0		-22	0	0	0
324				24	0		-21	0	0	0
325				24	0		-20	0	0	0
326				24	0		-19	0	0	0
327				24	0		-18	0	0	0
328				24	0		-17	0	0	0
329		CHH		24	0		-16	0	0	0
330				24	0		-15	0	0	0
331				24	0		-14	0	0	0
332				24	0		-13	0	0	0
333				24	0		-12	0	0	0
334		CHH		24	0		-11	0	0	0
335				24	0		-10	0	0	0
336				24	0		-9	0	0	0
337				24	0		-8	0	0	0
338				24	0		-7	0	0	0
339				24	0		-6	0	0	0
340				24	0		-5	0	0	0
341				24	0		-4	0	0	0
342				24	0		-3	0	0	0
343				24	0		-2	0	0	0
344				24	0		-1	0	0	0

## Sheet: 16C(LwV) plus Fig.S1
N=	24
		types	Cme	# samples	% methylation			CG	CHG	CHH
1				24	0		-344	0	0	0			# sites	Cme	%
2				24	0		-343	0	0	0		CHH	1536	27	1.75781
3				24	0		-342	0	0	0		CHG	168	10	5.95238
4				24	0		-341	0	0	0		CG	288	9	3.125
5				24	0		-340	0	0	0		Total	1992	46	2.30924
6				24	0		-339	0	0	0
7				24	0		-338	0	0	0
8		CHH		24	0		-337	0	0	0
9				24	0		-336	0	0	0
10				24	0		-335	0	0	0
11				24	0		-334	0	0	0
12				24	0		-333	0	0	0
13		CHH		24	0		-332	0	0	0
14				24	0		-331	0	0	0
15				24	0		-330	0	0	0
16		CHH		24	0		-329	0	0	0
17				24	0		-328	0	0	0
18				24	0		-327	0	0	0
19				24	0		-326	0	0	0
20				24	0		-325	0	0	0
21				24	0		-324	0	0	0
22				24	0		-323	0	0	0
23				24	0		-322	0	0	0
24				24	0		-321	0	0	0
25				24	0		-320	0	0	0
26				24	0		-319	0	0	0
27				24	0		-318	0	0	0
28				24	0		-317	0	0	0
29		CHG	2	24	8.33333		-316	0	8.33333	0
30		CG	3	24	12.5		-315	12.5	0	0
31				24	0		-314	0	0	0
32				24	0		-313	0	0	0
33				24	0		-312	0	0	0
34				24	0		-311	0	0	0
35				24	0		-310	0	0	0
36		CHH	1	24	4.16667		-309	0	0	4.16667
37		CHH	1	24	4.16667		-308	0	0	4.16667
38				24	0		-307	0	0	0
39		CHH	1	24	4.16667		-306	0	0	4.16667
40		CHH	1	24	4.16667		-305	0	0	4.16667
41				24	0		-304	0	0	0
42		CG	1	24	4.16667		-303	4.16667	0	0
43				24	0		-302	0	0	0
44				24	0		-301	0	0	0
45				24	0		-300	0	0	0
46				24	0		-299	0	0	0
47				24	0		-298	0	0	0
48		CHH	2	24	8.33333		-297	0	0	8.33333
49		CHH	1	24	4.16667		-296	0	0	4.16667
50				24	0		-295	0	0	0
51				24	0		-294	0	0	0
52				24	0		-293	0	0	0
53				24	0		-292	0	0	0
54		CHH		24	0		-291	0	0	0
55		CHH		24	0		-290	0	0	0
56		CHG	2	24	8.33333		-289	0	8.33333	0
57				24	0		-288	0	0	0
58				24	0		-287	0	0	0
59		CHH		24	0		-286	0	0	0
60				24	0		-285	0	0	0
61				24	0		-284	0	0	0
62				24	0		-283	0	0	0
63		CHG	3	24	12.5		-282	0	12.5	0
64				24	0		-281	0	0	0
65				24	0		-280	0	0	0
66				24	0		-279	0	0	0
67		CHH	2	24	8.33333		-278	0	0	8.33333
68				24	0		-277	0	0	0
69		CHH		24	0		-276	0	0	0
70				24	0		-275	0	0	0
71				24	0		-274	0	0	0
72				24	0		-273	0	0	0
73				24	0		-272	0	0	0
74				24	0		-271	0	0	0
75				24	0		-270	0	0	0
76				24	0		-269	0	0	0
77				24	0		-268	0	0	0
78				24	0		-267	0	0	0
79				24	0		-266	0	0	0
80				24	0		-265	0	0	0
81				24	0		-264	0	0	0
82				24	0		-263	0	0	0
83				24	0		-262	0	0	0
84				24	0		-261	0	0	0
85				24	0		-260	0	0	0
86				24	0		-259	0	0	0
87				24	0		-258	0	0	0
88				24	0		-257	0	0	0
89				24	0		-256	0	0	0
90				24	0		-255	0	0	0
91				24	0		-254	0	0	0
92				24	0		-253	0	0	0
93				24	0		-252	0	0	0
94				24	0		-251	0	0	0
95				24	0		-250	0	0	0
96				24	0		-249	0	0	0
97				24	0		-248	0	0	0
98				24	0		-247	0	0	0
99				24	0		-246	0	0	0
100				24	0		-245	0	0	0
101				24	0		-244	0	0	0
102		CHH	1	24	4.16667		-243	0	0	4.16667
103				24	0		-242	0	0	0
104		CHH	1	24	4.16667		-241	0	0	4.16667
105		CHH	2	24	8.33333		-240	0	0	8.33333
106				24	0		-239	0	0	0
107				24	0		-238	0	0	0
108		CHH	1	24	4.16667		-237	0	0	4.16667
109				24	0		-236	0	0	0
110				24	0		-235	0	0	0
111				24	0		-234	0	0	0
112				24	0		-233	0	0	0
113				24	0		-232	0	0	0
114		CHH	2	24	8.33333		-231	0	0	8.33333
115		CHH	1	24	4.16667		-230	0	0	4.16667
116				24	0		-229	0	0	0
117				24	0		-228	0	0	0
118		CHH	1	24	4.16667		-227	0	0	4.16667
119				24	0		-226	0	0	0
120				24	0		-225	0	0	0
121				24	0		-224	0	0	0
122				24	0		-223	0	0	0
123		CG	2	24	8.33333		-222	8.33333	0	0
124				24	0		-221	0	0	0
125				24	0		-220	0	0	0
126				24	0		-219	0	0	0
127				24	0		-218	0	0	0
128				24	0		-217	0	0	0
129				24	0		-216	0	0	0
130				24	0		-215	0	0	0
131				24	0		-214	0	0	0
132				24	0		-213	0	0	0
133				24	0		-212	0	0	0
134				24	0		-211	0	0	0
135				24	0		-210	0	0	0
136				24	0		-209	0	0	0
137		CHH	1	24	4.16667		-208	0	0	4.16667
138		CHH	1	24	4.16667		-207	0	0	4.16667
139				24	0		-206	0	0	0
140				24	0		-205	0	0	0
141		CG	2	24	8.33333		-204	8.33333	0	0
142				24	0		-203	0	0	0
143				24	0		-202	0	0	0
144				24	0		-201	0	0	0
145				24	0		-200	0	0	0
146				24	0		-199	0	0	0
147				24	0		-198	0	0	0
148				24	0		-197	0	0	0
149				24	0		-196	0	0	0
150				24	0		-195	0	0	0
151				24	0		-194	0	0	0
152		CHH		24	0		-193	0	0	0
153		CHH		24	0		-192	0	0	0
154				24	0		-191	0	0	0
155		CHG	1	24	4.16667		-190	0	4.16667	0
156				24	0		-189	0	0	0
157				24	0		-188	0	0	0
158		CHG	1	24	4.16667		-187	0	4.16667	0
159		CG		24	0		-186	0	0	0
160				24	0		-185	0	0	0
161				24	0		-184	0	0	0
162		CHG	1	24	4.16667		-183	0	4.16667	0
163				24	0		-182	0	0	0
164				24	0		-181	0	0	0
165				24	0		-180	0	0	0
166				24	0		-179	0	0	0
167				24	0		-178	0	0	0
168				24	0		-177	0	0	0
169		CHH	1	24	4.16667		-176	0	0	4.16667
170		CHH		24	0		-175	0	0	0
171		CHH	1	24	4.16667		-174	0	0	4.16667
172				24	0		-173	0	0	0
173				24	0		-172	0	0	0
174				24	0		-171	0	0	0
175				24	0		-170	0	0	0
176				24	0		-169	0	0	0
177				24	0		-168	0	0	0
178				24	0		-167	0	0	0
179				24	0		-166	0	0	0
180				24	0		-165	0	0	0
181		CHH		24	0		-164	0	0	0
182		CHH		24	0		-163	0	0	0
183		CHH		24	0		-162	0	0	0
184		CHH	1	24	4.16667		-161	0	0	4.16667
185		CHH	2	24	8.33333		-160	0	0	8.33333
186				24	0		-159	0	0	0
187		CHH		24	0		-158	0	0	0
188		CHH		24	0		-157	0	0	0
189		CHH		24	0		-156	0	0	0
190				24	0		-155	0	0	0
191		CG		24	0		-154	0	0	0
192				24	0		-153	0	0	0
193				24	0		-152	0	0	0
194				24	0		-151	0	0	0
195				24	0		-150	0	0	0
196				24	0		-149	0	0	0
197				24	0		-148	0	0	0
198		CHH		24	0		-147	0	0	0
199				24	0		-146	0	0	0
200				24	0		-145	0	0	0
201		CG	1	24	4.16667		-144	4.16667	0	0
202				24	0		-143	0	0	0
203				24	0		-142	0	0	0
204				24	0		-141	0	0	0
205				24	0		-140	0	0	0
206				24	0		-139	0	0	0
207				24	0		-138	0	0	0
208				24	0		-137	0	0	0
209				24	0		-136	0	0	0
210				24	0		-135	0	0	0
211				24	0		-134	0	0	0
212				24	0		-133	0	0	0
213				24	0		-132	0	0	0
214				24	0		-131	0	0	0
215				24	0		-130	0	0	0
216		CG		24	0		-129	0	0	0
217				24	0		-128	0	0	0
218				24	0		-127	0	0	0
219				24	0		-126	0	0	0
220		CHH		24	0		-125	0	0	0
221		CHH		24	0		-124	0	0	0
222				24	0		-123	0	0	0
223				24	0		-122	0	0	0
224		CHH		24	0		-121	0	0	0
225		CHH		24	0		-120	0	0	0
226				24	0		-119	0	0	0
227		CG		24	0		-118	0	0	0
228				24	0		-117	0	0	0
229				24	0		-116	0	0	0
230		CHH		24	0		-115	0	0	0
231				24	0		-114	0	0	0
232				24	0		-113	0	0	0
233		CHH		24	0		-112	0	0	0
234				24	0		-111	0	0	0
235				24	0		-110	0	0	0
236				24	0		-109	0	0	0
237				24	0		-108	0	0	0
238		CHH		24	0		-107	0	0	0
239				24	0		-106	0	0	0
240				24	0		-105	0	0	0
241				24	0		-104	0	0	0
242				24	0		-103	0	0	0
243				24	0		-102	0	0	0
244				24	0		-101	0	0	0
245				24	0		-100	0	0	0
246				24	0		-99	0	0	0
247				24	0		-98	0	0	0
248				24	0		-97	0	0	0
249				24	0		-96	0	0	0
250				24	0		-95	0	0	0
251				24	0		-94	0	0	0
252				24	0		-93	0	0	0
253				24	0		-92	0	0	0
254				24	0		-91	0	0	0
255				24	0		-90	0	0	0
256				24	0		-89	0	0	0
257				24	0		-88	0	0	0
258		CHH		24	0		-87	0	0	0
259				24	0		-86	0	0	0
260		CHH		24	0		-85	0	0	0
261		CHH		24	0		-84	0	0	0
262				24	0		-83	0	0	0
263		CHG		24	0		-82	0	0	0
264				24	0		-81	0	0	0
265				24	0		-80	0	0	0
266				24	0		-79	0	0	0
267		CG		24	0		-78	0	0	0
268				24	0		-77	0	0	0
269				24	0		-76	0	0	0
270				24	0		-75	0	0	0
271				24	0		-74	0	0	0
272				24	0		-73	0	0	0
273				24	0		-72	0	0	0
274				24	0		-71	0	0	0
275				24	0		-70	0	0	0
276				24	0		-69	0	0	0
277				24	0		-68	0	0	0
278				24	0		-67	0	0	0
279		CG		24	0		-66	0	0	0
280				24	0		-65	0	0	0
281		CHH	1	24	4.16667		-64	0	0	4.16667
282				24	0		-63	0	0	0
283		CHH		24	0		-62	0	0	0
284				24	0		-61	0	0	0
285				24	0		-60	0	0	0
286				24	0		-59	0	0	0
287		CHH		24	0		-58	0	0	0
288		CHH		24	0		-57	0	0	0
289		CHH		24	0		-56	0	0	0
290				24	0		-55	0	0	0
291		CHH		24	0		-54	0	0	0
292				24	0		-53	0	0	0
293				24	0		-52	0	0	0
294				24	0		-51	0	0	0
295		CHH		24	0		-50	0	0	0
296		CHH		24	0		-49	0	0	0
297				24	0		-48	0	0	0
298				24	0		-47	0	0	0
299		CG		24	0		-46	0	0	0
300				24	0		-45	0	0	0
301		CHH		24	0		-44	0	0	0
302				24	0		-43	0	0	0
303				24	0		-42	0	0	0
304				24	0		-41	0	0	0
305				24	0		-40	0	0	0
306		CHH		24	0		-39	0	0	0
307		CHH		24	0		-38	0	0	0
308		CHH		24	0		-37	0	0	0
309				24	0		-36	0	0	0
310				24	0		-35	0	0	0
311		CHH		24	0		-34	0	0	0
312		CHH	1	24	4.16667		-33	0	0	4.16667
313				24	0		-32	0	0	0
314		CHH		24	0		-31	0	0	0
315				24	0		-30	0	0	0
316				24	0		-29	0	0	0
317				24	0		-28	0	0	0
318				24	0		-27	0	0	0
319				24	0		-26	0	0	0
320				24	0		-25	0	0	0
321				24	0		-24	0	0	0
322				24	0		-23	0	0	0
323				24	0		-22	0	0	0
324				24	0		-21	0	0	0
325				24	0		-20	0	0	0
326				24	0		-19	0	0	0
327				24	0		-18	0	0	0
328				24	0		-17	0	0	0
329		CHH		24	0		-16	0	0	0
330				24	0		-15	0	0	0
331				24	0		-14	0	0	0
332				24	0		-13	0	0	0
333				24	0		-12	0	0	0
334		CHH		24	0		-11	0	0	0
335				24	0		-10	0	0	0
336				24	0		-9	0	0	0
337				24	0		-8	0	0	0
338				24	0		-7	0	0	0
339				24	0		-6	0	0	0
340				24	0		-5	0	0	0
341				24	0		-4	0	0	0
342				24	0		-3	0	0	0
343				24	0		-2	0	0	0
344				24	0		-1	0	0	0

## Sheet: 208RED(Vein) plus Fig.5
N=	24
		types	Cme	# samples	% methylation			CG	CHG	CHH
1				24	0		-344	0	0	0			# sites	Cme	%
2				24	0		-343	0	0	0		CHH	1536	404	26.3021
3				24	0		-342	0	0	0		CHG	168	106	63.0952
4				24	0		-341	0	0	0		CG	288	185	64.2361
5				24	0		-340	0	0	0		Total	1992	695	34.8896
6				24	0		-339	0	0	0
7				24	0		-338	0	0	0
8		CHH		24	0		-337	0	0	0
9				24	0		-336	0	0	0
10				24	0		-335	0	0	0
11				24	0		-334	0	0	0
12				24	0		-333	0	0	0
13		CHH		24	0		-332	0	0	0
14				24	0		-331	0	0	0
15				24	0		-330	0	0	0
16		CHH		24	0		-329	0	0	0
17				24	0		-328	0	0	0
18				24	0		-327	0	0	0
19				24	0		-326	0	0	0
20				24	0		-325	0	0	0
21				24	0		-324	0	0	0
22				24	0		-323	0	0	0
23				24	0		-322	0	0	0
24				24	0		-321	0	0	0
25				24	0		-320	0	0	0
26				24	0		-319	0	0	0
27				24	0		-318	0	0	0
28				24	0		-317	0	0	0
29		CHG	8	24	33.3333		-316	0	33.3333	0
30		CG	13	24	54.1667		-315	54.1667	0	0
31				24	0		-314	0	0	0
32				24	0		-313	0	0	0
33				24	0		-312	0	0	0
34				24	0		-311	0	0	0
35				24	0		-310	0	0	0
36		CHH	2	24	8.33333		-309	0	0	8.33333
37		CHH	1	24	4.16667		-308	0	0	4.16667
38				24	0		-307	0	0	0
39		CHH	3	24	12.5		-306	0	0	12.5
40		CHH	4	24	16.6667		-305	0	0	16.6667
41				24	0		-304	0	0	0
42		CG	12	24	50		-303	50	0	0
43				24	0		-302	0	0	0
44				24	0		-301	0	0	0
45				24	0		-300	0	0	0
46				24	0		-299	0	0	0
47				24	0		-298	0	0	0
48		CHH	13	24	54.1667		-297	0	0	54.1667
49		CHH	2	24	8.33333		-296	0	0	8.33333
50				24	0		-295	0	0	0
51				24	0		-294	0	0	0
52				24	0		-293	0	0	0
53				24	0		-292	0	0	0
54		CHH		24	0		-291	0	0	0
55		CHH		24	0		-290	0	0	0
56		CHG	9	24	37.5		-289	0	37.5	0
57				24	0		-288	0	0	0
58				24	0		-287	0	0	0
59		CHH	1	24	4.16667		-286	0	0	4.16667
60				24	0		-285	0	0	0
61				24	0		-284	0	0	0
62				24	0		-283	0	0	0
63		CHG	9	24	37.5		-282	0	37.5	0
64				24	0		-281	0	0	0
65				24	0		-280	0	0	0
66				24	0		-279	0	0	0
67		CHH	2	24	8.33333		-278	0	0	8.33333
68				24	0		-277	0	0	0
69		CHH		24	0		-276	0	0	0
70				24	0		-275	0	0	0
71				24	0		-274	0	0	0
72				24	0		-273	0	0	0
73				24	0		-272	0	0	0
74				24	0		-271	0	0	0
75				24	0		-270	0	0	0
76				24	0		-269	0	0	0
77				24	0		-268	0	0	0
78				24	0		-267	0	0	0
79				24	0		-266	0	0	0
80				24	0		-265	0	0	0
81				24	0		-264	0	0	0
82				24	0		-263	0	0	0
83				24	0		-262	0	0	0
84				24	0		-261	0	0	0
85				24	0		-260	0	0	0
86				24	0		-259	0	0	0
87				24	0		-258	0	0	0
88				24	0		-257	0	0	0
89				24	0		-256	0	0	0
90				24	0		-255	0	0	0
91				24	0		-254	0	0	0
92				24	0		-253	0	0	0
93				24	0		-252	0	0	0
94				24	0		-251	0	0	0
95				24	0		-250	0	0	0
96				24	0		-249	0	0	0
97				24	0		-248	0	0	0
98				24	0		-247	0	0	0
99				24	0		-246	0	0	0
100				24	0		-245	0	0	0
101				24	0		-244	0	0	0
102		CHH	13	24	54.1667		-243	0	0	54.1667
103				24	0		-242	0	0	0
104		CHH	1	24	4.16667		-241	0	0	4.16667
105		CHH	2	24	8.33333		-240	0	0	8.33333
106				24	0		-239	0	0	0
107				24	0		-238	0	0	0
108		CHH		24	0		-237	0	0	0
109				24	0		-236	0	0	0
110				24	0		-235	0	0	0
111				24	0		-234	0	0	0
112				24	0		-233	0	0	0
113				24	0		-232	0	0	0
114		CHH	1	24	4.16667		-231	0	0	4.16667
115		CHH	2	24	8.33333		-230	0	0	8.33333
116				24	0		-229	0	0	0
117				24	0		-228	0	0	0
118		CHH	1	24	4.16667		-227	0	0	4.16667
119				24	0		-226	0	0	0
120				24	0		-225	0	0	0
121				24	0		-224	0	0	0
122				24	0		-223	0	0	0
123		CG	7	24	29.1667		-222	29.1667	0	0
124				24	0		-221	0	0	0
125				24	0		-220	0	0	0
126				24	0		-219	0	0	0
127				24	0		-218	0	0	0
128				24	0		-217	0	0	0
129				24	0		-216	0	0	0
130				24	0		-215	0	0	0
131				24	0		-214	0	0	0
132				24	0		-213	0	0	0
133				24	0		-212	0	0	0
134				24	0		-211	0	0	0
135				24	0		-210	0	0	0
136				24	0		-209	0	0	0
137		CHH	13	24	54.1667		-208	0	0	54.1667
138		CHH	14	24	58.3333		-207	0	0	58.3333
139				24	0		-206	0	0	0
140				24	0		-205	0	0	0
141		CG	22	24	91.6667		-204	91.6667	0	0
142				24	0		-203	0	0	0
143				24	0		-202	0	0	0
144				24	0		-201	0	0	0
145				24	0		-200	0	0	0
146				24	0		-199	0	0	0
147				24	0		-198	0	0	0
148				24	0		-197	0	0	0
149				24	0		-196	0	0	0
150				24	0		-195	0	0	0
151				24	0		-194	0	0	0
152		CHH	12	24	50		-193	0	0	50
153		CHH	12	24	50		-192	0	0	50
154				24	0		-191	0	0	0
155		CHG	21	24	87.5		-190	0	87.5	0
156				24	0		-189	0	0	0
157				24	0		-188	0	0	0
158		CHG	16	24	66.6667		-187	0	66.6667	0
159		CG	22	24	91.6667		-186	91.6667	0	0
160				24	0		-185	0	0	0
161				24	0		-184	0	0	0
162		CHG	22	24	91.6667		-183	0	91.6667	0
163				24	0		-182	0	0	0
164				24	0		-181	0	0	0
165				24	0		-180	0	0	0
166				24	0		-179	0	0	0
167				24	0		-178	0	0	0
168				24	0		-177	0	0	0
169		CHH	13	24	54.1667		-176	0	0	54.1667
170		CHH	12	24	50		-175	0	0	50
171		CHH	13	24	54.1667		-174	0	0	54.1667
172				24	0		-173	0	0	0
173				24	0		-172	0	0	0
174				24	0		-171	0	0	0
175				24	0		-170	0	0	0
176				24	0		-169	0	0	0
177				24	0		-168	0	0	0
178				24	0		-167	0	0	0
179				24	0		-166	0	0	0
180				24	0		-165	0	0	0
181		CHH	12	24	50		-164	0	0	50
182		CHH	12	24	50		-163	0	0	50
183		CHH	12	24	50		-162	0	0	50
184		CHH	12	24	50		-161	0	0	50
185		CHH	15	24	62.5		-160	0	0	62.5
186				24	0		-159	0	0	0
187		CHH	12	24	50		-158	0	0	50
188		CHH	12	24	50		-157	0	0	50
189		CHH	13	24	54.1667		-156	0	0	54.1667
190				24	0		-155	0	0	0
191		CG	10	24	41.6667		-154	41.6667	0	0
192				24	0		-153	0	0	0
193				24	0		-152	0	0	0
194				24	0		-151	0	0	0
195				24	0		-150	0	0	0
196				24	0		-149	0	0	0
197				24	0		-148	0	0	0
198		CHH	14	24	58.3333		-147	0	0	58.3333
199				24	0		-146	0	0	0
200				24	0		-145	0	0	0
201		CG	23	24	95.8333		-144	95.8333	0	0
202				24	0		-143	0	0	0
203				24	0		-142	0	0	0
204				24	0		-141	0	0	0
205				24	0		-140	0	0	0
206				24	0		-139	0	0	0
207				24	0		-138	0	0	0
208				24	0		-137	0	0	0
209				24	0		-136	0	0	0
210				24	0		-135	0	0	0
211				24	0		-134	0	0	0
212				24	0		-133	0	0	0
213				24	0		-132	0	0	0
214				24	0		-131	0	0	0
215				24	0		-130	0	0	0
216		CG	22	24	91.6667		-129	91.6667	0	0
217				24	0		-128	0	0	0
218				24	0		-127	0	0	0
219				24	0		-126	0	0	0
220		CHH	14	24	58.3333		-125	0	0	58.3333
221		CHH	14	24	58.3333		-124	0	0	58.3333
222				24	0		-123	0	0	0
223				24	0		-122	0	0	0
224		CHH	15	24	62.5		-121	0	0	62.5
225		CHH	14	24	58.3333		-120	0	0	58.3333
226				24	0		-119	0	0	0
227		CG	23	24	95.8333		-118	95.8333	0	0
228				24	0		-117	0	0	0
229				24	0		-116	0	0	0
230		CHH	12	24	50		-115	0	0	50
231				24	0		-114	0	0	0
232				24	0		-113	0	0	0
233		CHH	14	24	58.3333		-112	0	0	58.3333
234				24	0		-111	0	0	0
235				24	0		-110	0	0	0
236				24	0		-109	0	0	0
237				24	0		-108	0	0	0
238		CHH	12	24	50		-107	0	0	50
239				24	0		-106	0	0	0
240				24	0		-105	0	0	0
241				24	0		-104	0	0	0
242				24	0		-103	0	0	0
243				24	0		-102	0	0	0
244				24	0		-101	0	0	0
245				24	0		-100	0	0	0
246				24	0		-99	0	0	0
247				24	0		-98	0	0	0
248				24	0		-97	0	0	0
249				24	0		-96	0	0	0
250				24	0		-95	0	0	0
251				24	0		-94	0	0	0
252				24	0		-93	0	0	0
253				24	0		-92	0	0	0
254				24	0		-91	0	0	0
255				24	0		-90	0	0	0
256				24	0		-89	0	0	0
257				24	0		-88	0	0	0
258		CHH	12	24	50		-87	0	0	50
259				24	0		-86	0	0	0
260		CHH	12	24	50		-85	0	0	50
261		CHH	15	24	62.5		-84	0	0	62.5
262				24	0		-83	0	0	0
263		CHG	21	24	87.5		-82	0	87.5	0
264				24	0		-81	0	0	0
265				24	0		-80	0	0	0
266				24	0		-79	0	0	0
267		CG	10	24	41.6667		-78	41.6667	0	0
268				24	0		-77	0	0	0
269				24	0		-76	0	0	0
270				24	0		-75	0	0	0
271				24	0		-74	0	0	0
272				24	0		-73	0	0	0
273				24	0		-72	0	0	0
274				24	0		-71	0	0	0
275				24	0		-70	0	0	0
276				24	0		-69	0	0	0
277				24	0		-68	0	0	0
278				24	0		-67	0	0	0
279		CG	9	24	37.5		-66	37.5	0	0
280				24	0		-65	0	0	0
281		CHH		24	0		-64	0	0	0
282				24	0		-63	0	0	0
283		CHH		24	0		-62	0	0	0
284				24	0		-61	0	0	0
285				24	0		-60	0	0	0
286				24	0		-59	0	0	0
287		CHH		24	0		-58	0	0	0
288		CHH		24	0		-57	0	0	0
289		CHH	12	24	50		-56	0	0	50
290				24	0		-55	0	0	0
291		CHH		24	0		-54	0	0	0
292				24	0		-53	0	0	0
293				24	0		-52	0	0	0
294				24	0		-51	0	0	0
295		CHH		24	0		-50	0	0	0
296		CHH	1	24	4.16667		-49	0	0	4.16667
297				24	0		-48	0	0	0
298				24	0		-47	0	0	0
299		CG	12	24	50		-46	50	0	0
300				24	0		-45	0	0	0
301		CHH	1	24	4.16667		-44	0	0	4.16667
302				24	0		-43	0	0	0
303				24	0		-42	0	0	0
304				24	0		-41	0	0	0
305				24	0		-40	0	0	0
306		CHH	1	24	4.16667		-39	0	0	4.16667
307		CHH		24	0		-38	0	0	0
308		CHH		24	0		-37	0	0	0
309				24	0		-36	0	0	0
310				24	0		-35	0	0	0
311		CHH		24	0		-34	0	0	0
312		CHH	2	24	8.33333		-33	0	0	8.33333
313				24	0		-32	0	0	0
314		CHH	2	24	8.33333		-31	0	0	8.33333
315				24	0		-30	0	0	0
316				24	0		-29	0	0	0
317				24	0		-28	0	0	0
318				24	0		-27	0	0	0
319				24	0		-26	0	0	0
320				24	0		-25	0	0	0
321				24	0		-24	0	0	0
322				24	0		-23	0	0	0
323				24	0		-22	0	0	0
324				24	0		-21	0	0	0
325				24	0		-20	0	0	0
326				24	0		-19	0	0	0
327				24	0		-18	0	0	0
328				24	0		-17	0	0	0
329		CHH		24	0		-16	0	0	0
330				24	0		-15	0	0	0
331				24	0		-14	0	0	0
332				24	0		-13	0	0	0
333				24	0		-12	0	0	0
334		CHH		24	0		-11	0	0	0
335				24	0		-10	0	0	0
336				24	0		-9	0	0	0
337				24	0		-8	0	0	0
338				24	0		-7	0	0	0
339				24	0		-6	0	0	0
340				24	0		-5	0	0	0
341				24	0		-4	0	0	0
342				24	0		-3	0	0	0
343				24	0		-2	0	0	0
344				24	0		-1	0	0	0

## Sheet: 208ORN(Vein) plus Fig.5
N=	24
		types	Cme	# samples	% methylation			CG	CHG	CHH
1				24	0		-344	0	0	0			# sites	Cme	%
2				24	0		-343	0	0	0		CHH	1536	520	33.8542
3				24	0		-342	0	0	0		CHG	168	94	55.9524
4				24	0		-341	0	0	0		CG	288	157	54.5139
5				24	0		-340	0	0	0		Total	1992	771	38.7048
6				24	0		-339	0	0	0
7				24	0		-338	0	0	0
8		CHH		24	0		-337	0	0	0
9				24	0		-336	0	0	0
10				24	0		-335	0	0	0
11				24	0		-334	0	0	0
12				24	0		-333	0	0	0
13		CHH		24	0		-332	0	0	0
14				24	0		-331	0	0	0
15				24	0		-330	0	0	0
16		CHH		24	0		-329	0	0	0
17				24	0		-328	0	0	0
18				24	0		-327	0	0	0
19				24	0		-326	0	0	0
20				24	0		-325	0	0	0
21				24	0		-324	0	0	0
22				24	0		-323	0	0	0
23				24	0		-322	0	0	0
24				24	0		-321	0	0	0
25				24	0		-320	0	0	0
26				24	0		-319	0	0	0
27				24	0		-318	0	0	0
28				24	0		-317	0	0	0
29		CHG	7	24	29.1667		-316	0	29.1667	0
30		CG	6	24	25		-315	25	0	0
31				24	0		-314	0	0	0
32				24	0		-313	0	0	0
33				24	0		-312	0	0	0
34				24	0		-311	0	0	0
35				24	0		-310	0	0	0
36		CHH	3	24	12.5		-309	0	0	12.5
37		CHH	2	24	8.33333		-308	0	0	8.33333
38				24	0		-307	0	0	0
39		CHH	5	24	20.8333		-306	0	0	20.8333
40		CHH	2	24	8.33333		-305	0	0	8.33333
41				24	0		-304	0	0	0
42		CG	7	24	29.1667		-303	29.1667	0	0
43				24	0		-302	0	0	0
44				24	0		-301	0	0	0
45				24	0		-300	0	0	0
46				24	0		-299	0	0	0
47				24	0		-298	0	0	0
48		CHH	16	24	66.6667		-297	0	0	66.6667
49		CHH	3	24	12.5		-296	0	0	12.5
50				24	0		-295	0	0	0
51				24	0		-294	0	0	0
52				24	0		-293	0	0	0
53				24	0		-292	0	0	0
54		CHH	1	24	4.16667		-291	0	0	4.16667
55		CHH	3	24	12.5		-290	0	0	12.5
56		CHG	7	24	29.1667		-289	0	29.1667	0
57				24	0		-288	0	0	0
58				24	0		-287	0	0	0
59		CHH	2	24	8.33333		-286	0	0	8.33333
60				24	0		-285	0	0	0
61				24	0		-284	0	0	0
62				24	0		-283	0	0	0
63		CHG	5	24	20.8333		-282	0	20.8333	0
64				24	0		-281	0	0	0
65				24	0		-280	0	0	0
66				24	0		-279	0	0	0
67		CHH	1	24	4.16667		-278	0	0	4.16667
68				24	0		-277	0	0	0
69		CHH	1	24	4.16667		-276	0	0	4.16667
70				24	0		-275	0	0	0
71				24	0		-274	0	0	0
72				24	0		-273	0	0	0
73				24	0		-272	0	0	0
74				24	0		-271	0	0	0
75				24	0		-270	0	0	0
76				24	0		-269	0	0	0
77				24	0		-268	0	0	0
78				24	0		-267	0	0	0
79				24	0		-266	0	0	0
80				24	0		-265	0	0	0
81				24	0		-264	0	0	0
82				24	0		-263	0	0	0
83				24	0		-262	0	0	0
84				24	0		-261	0	0	0
85				24	0		-260	0	0	0
86				24	0		-259	0	0	0
87				24	0		-258	0	0	0
88				24	0		-257	0	0	0
89				24	0		-256	0	0	0
90				24	0		-255	0	0	0
91				24	0		-254	0	0	0
92				24	0		-253	0	0	0
93				24	0		-252	0	0	0
94				24	0		-251	0	0	0
95				24	0		-250	0	0	0
96				24	0		-249	0	0	0
97				24	0		-248	0	0	0
98				24	0		-247	0	0	0
99				24	0		-246	0	0	0
100				24	0		-245	0	0	0
101				24	0		-244	0	0	0
102		CHH	16	24	66.6667		-243	0	0	66.6667
103				24	0		-242	0	0	0
104		CHH	2	24	8.33333		-241	0	0	8.33333
105		CHH	4	24	16.6667		-240	0	0	16.6667
106				24	0		-239	0	0	0
107				24	0		-238	0	0	0
108		CHH	2	24	8.33333		-237	0	0	8.33333
109				24	0		-236	0	0	0
110				24	0		-235	0	0	0
111				24	0		-234	0	0	0
112				24	0		-233	0	0	0
113				24	0		-232	0	0	0
114		CHH	2	24	8.33333		-231	0	0	8.33333
115		CHH	2	24	8.33333		-230	0	0	8.33333
116				24	0		-229	0	0	0
117				24	0		-228	0	0	0
118		CHH	3	24	12.5		-227	0	0	12.5
119				24	0		-226	0	0	0
120				24	0		-225	0	0	0
121				24	0		-224	0	0	0
122				24	0		-223	0	0	0
123		CG	6	24	25		-222	25	0	0
124				24	0		-221	0	0	0
125				24	0		-220	0	0	0
126				24	0		-219	0	0	0
127				24	0		-218	0	0	0
128				24	0		-217	0	0	0
129				24	0		-216	0	0	0
130				24	0		-215	0	0	0
131				24	0		-214	0	0	0
132				24	0		-213	0	0	0
133				24	0		-212	0	0	0
134				24	0		-211	0	0	0
135				24	0		-210	0	0	0
136				24	0		-209	0	0	0
137		CHH	16	24	66.6667		-208	0	0	66.6667
138		CHH	19	24	79.1667		-207	0	0	79.1667
139				24	0		-206	0	0	0
140				24	0		-205	0	0	0
141		CG	22	24	91.6667		-204	91.6667	0	0
142				24	0		-203	0	0	0
143				24	0		-202	0	0	0
144				24	0		-201	0	0	0
145				24	0		-200	0	0	0
146				24	0		-199	0	0	0
147				24	0		-198	0	0	0
148				24	0		-197	0	0	0
149				24	0		-196	0	0	0
150				24	0		-195	0	0	0
151				24	0		-194	0	0	0
152		CHH	16	24	66.6667		-193	0	0	66.6667
153		CHH	16	24	66.6667		-192	0	0	66.6667
154				24	0		-191	0	0	0
155		CHG	18	24	75		-190	0	75	0
156				24	0		-189	0	0	0
157				24	0		-188	0	0	0
158		CHG	20	24	83.3333		-187	0	83.3333	0
159		CG	23	24	95.8333		-186	95.8333	0	0
160				24	0		-185	0	0	0
161				24	0		-184	0	0	0
162		CHG	22	24	91.6667		-183	0	91.6667	0
163				24	0		-182	0	0	0
164				24	0		-181	0	0	0
165				24	0		-180	0	0	0
166				24	0		-179	0	0	0
167				24	0		-178	0	0	0
168				24	0		-177	0	0	0
169		CHH	16	24	66.6667		-176	0	0	66.6667
170		CHH	17	24	70.8333		-175	0	0	70.8333
171		CHH	16	24	66.6667		-174	0	0	66.6667
172				24	0		-173	0	0	0
173				24	0		-172	0	0	0
174				24	0		-171	0	0	0
175				24	0		-170	0	0	0
176				24	0		-169	0	0	0
177				24	0		-168	0	0	0
178				24	0		-167	0	0	0
179				24	0		-166	0	0	0
180				24	0		-165	0	0	0
181		CHH	17	24	70.8333		-164	0	0	70.8333
182		CHH	17	24	70.8333		-163	0	0	70.8333
183		CHH	17	24	70.8333		-162	0	0	70.8333
184		CHH	18	24	75		-161	0	0	75
185		CHH	20	24	83.3333		-160	0	0	83.3333
186				24	0		-159	0	0	0
187		CHH	17	24	70.8333		-158	0	0	70.8333
188		CHH	17	24	70.8333		-157	0	0	70.8333
189		CHH	16	24	66.6667		-156	0	0	66.6667
190				24	0		-155	0	0	0
191		CG	3	24	12.5		-154	12.5	0	0
192				24	0		-153	0	0	0
193				24	0		-152	0	0	0
194				24	0		-151	0	0	0
195				24	0		-150	0	0	0
196				24	0		-149	0	0	0
197				24	0		-148	0	0	0
198		CHH	20	24	83.3333		-147	0	0	83.3333
199				24	0		-146	0	0	0
200				24	0		-145	0	0	0
201		CG	21	24	87.5		-144	87.5	0	0
202				24	0		-143	0	0	0
203				24	0		-142	0	0	0
204				24	0		-141	0	0	0
205				24	0		-140	0	0	0
206				24	0		-139	0	0	0
207				24	0		-138	0	0	0
208				24	0		-137	0	0	0
209				24	0		-136	0	0	0
210				24	0		-135	0	0	0
211				24	0		-134	0	0	0
212				24	0		-133	0	0	0
213				24	0		-132	0	0	0
214				24	0		-131	0	0	0
215				24	0		-130	0	0	0
216		CG	20	24	83.3333		-129	83.3333	0	0
217				24	0		-128	0	0	0
218				24	0		-127	0	0	0
219				24	0		-126	0	0	0
220		CHH	18	24	75		-125	0	0	75
221		CHH	15	24	62.5		-124	0	0	62.5
222				24	0		-123	0	0	0
223				24	0		-122	0	0	0
224		CHH	16	24	66.6667		-121	0	0	66.6667
225		CHH	15	24	62.5		-120	0	0	62.5
226				24	0		-119	0	0	0
227		CG	20	24	83.3333		-118	83.3333	0	0
228				24	0		-117	0	0	0
229				24	0		-116	0	0	0
230		CHH	17	24	70.8333		-115	0	0	70.8333
231				24	0		-114	0	0	0
232				24	0		-113	0	0	0
233		CHH	15	24	62.5		-112	0	0	62.5
234				24	0		-111	0	0	0
235				24	0		-110	0	0	0
236				24	0		-109	0	0	0
237				24	0		-108	0	0	0
238		CHH	4	24	16.6667		-107	0	0	16.6667
239				24	0		-106	0	0	0
240				24	0		-105	0	0	0
241				24	0		-104	0	0	0
242				24	0		-103	0	0	0
243				24	0		-102	0	0	0
244				24	0		-101	0	0	0
245				24	0		-100	0	0	0
246				24	0		-99	0	0	0
247				24	0		-98	0	0	0
248				24	0		-97	0	0	0
249				24	0		-96	0	0	0
250				24	0		-95	0	0	0
251				24	0		-94	0	0	0
252				24	0		-93	0	0	0
253				24	0		-92	0	0	0
254				24	0		-91	0	0	0
255				24	0		-90	0	0	0
256				24	0		-89	0	0	0
257				24	0		-88	0	0	0
258		CHH	15	24	62.5		-87	0	0	62.5
259				24	0		-86	0	0	0
260		CHH	15	24	62.5		-85	0	0	62.5
261		CHH	17	24	70.8333		-84	0	0	70.8333
262				24	0		-83	0	0	0
263		CHG	15	24	62.5		-82	0	62.5	0
264				24	0		-81	0	0	0
265				24	0		-80	0	0	0
266				24	0		-79	0	0	0
267		CG	8	24	33.3333		-78	33.3333	0	0
268				24	0		-77	0	0	0
269				24	0		-76	0	0	0
270				24	0		-75	0	0	0
271				24	0		-74	0	0	0
272				24	0		-73	0	0	0
273				24	0		-72	0	0	0
274				24	0		-71	0	0	0
275				24	0		-70	0	0	0
276				24	0		-69	0	0	0
277				24	0		-68	0	0	0
278				24	0		-67	0	0	0
279		CG	6	24	25		-66	25	0	0
280				24	0		-65	0	0	0
281		CHH		24	0		-64	0	0	0
282				24	0		-63	0	0	0
283		CHH	2	24	8.33333		-62	0	0	8.33333
284				24	0		-61	0	0	0
285				24	0		-60	0	0	0
286				24	0		-59	0	0	0
287		CHH	2	24	8.33333		-58	0	0	8.33333
288		CHH	1	24	4.16667		-57	0	0	4.16667
289		CHH	17	24	70.8333		-56	0	0	70.8333
290				24	0		-55	0	0	0
291		CHH	2	24	8.33333		-54	0	0	8.33333
292				24	0		-53	0	0	0
293				24	0		-52	0	0	0
294				24	0		-51	0	0	0
295		CHH		24	0		-50	0	0	0
296		CHH	2	24	8.33333		-49	0	0	8.33333
297				24	0		-48	0	0	0
298				24	0		-47	0	0	0
299		CG	15	24	62.5		-46	62.5	0	0
300				24	0		-45	0	0	0
301		CHH		24	0		-44	0	0	0
302				24	0		-43	0	0	0
303				24	0		-42	0	0	0
304				24	0		-41	0	0	0
305				24	0		-40	0	0	0
306		CHH		24	0		-39	0	0	0
307		CHH		24	0		-38	0	0	0
308		CHH		24	0		-37	0	0	0
309				24	0		-36	0	0	0
310				24	0		-35	0	0	0
311		CHH		24	0		-34	0	0	0
312		CHH	1	24	4.16667		-33	0	0	4.16667
313				24	0		-32	0	0	0
314		CHH	1	24	4.16667		-31	0	0	4.16667
315				24	0		-30	0	0	0
316				24	0		-29	0	0	0
317				24	0		-28	0	0	0
318				24	0		-27	0	0	0
319				24	0		-26	0	0	0
320				24	0		-25	0	0	0
321				24	0		-24	0	0	0
322				24	0		-23	0	0	0
323				24	0		-22	0	0	0
324				24	0		-21	0	0	0
325				24	0		-20	0	0	0
326				24	0		-19	0	0	0
327				24	0		-18	0	0	0
328				24	0		-17	0	0	0
329		CHH		24	0		-16	0	0	0
330				24	0		-15	0	0	0
331				24	0		-14	0	0	0
332				24	0		-13	0	0	0
333				24	0		-12	0	0	0
334		CHH		24	0		-11	0	0	0
335				24	0		-10	0	0	0
336				24	0		-9	0	0	0
337				24	0		-8	0	0	0
338				24	0		-7	0	0	0
339				24	0		-6	0	0	0
340				24	0		-5	0	0	0
341				24	0		-4	0	0	0
342				24	0		-3	0	0	0
343				24	0		-2	0	0	0
344				24	0		-1	0	0	0

## Sheet: 208RED(Vein) minus Fig.5
N=	24
		types	Cme	# samples	% methylation			CG	CHG	CHH
1				24	0		-24	0	0	0			# sites	Cme	%
2				24	0		-25	0	0	0		CHH	1224	140	11.4379		CHH	11.4379
3				24	0		-26	0	0	0		CHG	168	144	85.7143		CHG	85.7143
4				24	0		-27	0	0	0		CG	288	255	88.5417		CG	88.5417
5				24	0		-28	0	0	0		Total	1680	539	32.0833		Total	32.0833
6				24	0		-29	0	0	0
7				24	0		-30	0	0	0
8				24	0		-31	0	0	0
9				24	0		-32	0	0	0
10				24	0		-33	0	0	0
11				24	0		-34	0	0	0
12				24	0		-35	0	0	0
13				24	0		-36	0	0	0
14				24	0		-37	0	0	0
15				24	0		-38	0	0	0
16				24	0		-39	0	0	0
17				24	0		-40	0	0	0
18		CHH	9	24	37.5		-41	0	0	37.5
19				24	0		-42	0	0	0
20				24	0		-43	0	0	0
21				24	0		-44	0	0	0
22		CG	16	24	66.6667		-45	66.6667	0	0
23				24	0		-46	0	0	0
24				24	0		-47	0	0	0
25				24	0		-48	0	0	0
26				24	0		-49	0	0	0
27				24	0		-50	0	0	0
28				24	0		-51	0	0	0
29				24	0		-52	0	0	0
30				24	0		-53	0	0	0
31				24	0		-54	0	0	0
32				24	0		-55	0	0	0
33				24	0		-56	0	0	0
34				24	0		-57	0	0	0
35				24	0		-58	0	0	0
36				24	0		-59	0	0	0
37				24	0		-60	0	0	0
38				24	0		-61	0	0	0
39				24	0		-62	0	0	0
40				24	0		-63	0	0	0
41				24	0		-64	0	0	0
42		CG	20	24	83.3333		-65	83.3333	0	0
43				24	0		-66	0	0	0
44				24	0		-67	0	0	0
45		CHH	2	24	8.33333		-68	0	0	8.33333
46				24	0		-69	0	0	0
47				24	0		-70	0	0	0
48		CHH	3	24	12.5		-71	0	0	12.5
49		CHH	3	24	12.5		-72	0	0	12.5
50		CHH	2	24	8.33333		-73	0	0	8.33333
51				24	0		-74	0	0	0
52				24	0		-75	0	0	0
53				24	0		-76	0	0	0
54		CG	22	24	91.6667		-77	91.6667	0	0
55				24	0		-78	0	0	0
56				24	0		-79	0	0	0
57		CHG	16	24	66.6667		-80	0	66.6667	0
58				24	0		-81	0	0	0
59				24	0		-82	0	0	0
60				24	0		-83	0	0	0
61				24	0		-84	0	0	0
62				24	0		-85	0	0	0
63				24	0		-86	0	0	0
64				24	0		-87	0	0	0
65				24	0		-88	0	0	0
66				24	0		-89	0	0	0
67				24	0		-90	0	0	0
68				24	0		-91	0	0	0
69		CHH		24	0		-92	0	0	0
70				24	0		-93	0	0	0
71		CHH		24	0		-94	0	0	0
72				24	0		-95	0	0	0
73				24	0		-96	0	0	0
74		CHH	1	24	4.16667		-97	0	0	4.16667
75				24	0		-98	0	0	0
76				24	0		-99	0	0	0
77				24	0		-100	0	0	0
78		CHH		24	0		-101	0	0	0
79		CHH	1	24	4.16667		-102	0	0	4.16667
80				24	0		-103	0	0	0
81		CHH	1	24	4.16667		-104	0	0	4.16667
82				24	0		-105	0	0	0
83				24	0		-106	0	0	0
84				24	0		-107	0	0	0
85		CHH		24	0		-108	0	0	0
86				24	0		-109	0	0	0
87				24	0		-110	0	0	0
88				24	0		-111	0	0	0
89				24	0		-112	0	0	0
90				24	0		-113	0	0	0
91				24	0		-114	0	0	0
92				24	0		-115	0	0	0
93				24	0		-116	0	0	0
94		CG	24	24	100		-117	100	0	0
95				24	0		-118	0	0	0
96				24	0		-119	0	0	0
97				24	0		-120	0	0	0
98				24	0		-121	0	0	0
99				24	0		-122	0	0	0
100				24	0		-123	0	0	0
101				24	0		-124	0	0	0
102				24	0		-125	0	0	0
103				24	0		-126	0	0	0
104				24	0		-127	0	0	0
105		CG	23	24	95.8333		-128	95.8333	0	0
106				24	0		-129	0	0	0
107				24	0		-130	0	0	0
108		CHH	5	24	20.8333		-131	0	0	20.8333
109				24	0		-132	0	0	0
110				24	0		-133	0	0	0
111		CHH	2	24	8.33333		-134	0	0	8.33333
112				24	0		-135	0	0	0
113				24	0		-136	0	0	0
114				24	0		-137	0	0	0
115				24	0		-138	0	0	0
116				24	0		-139	0	0	0
117		CHH	1	24	4.16667		-140	0	0	4.16667
118		CHH	1	24	4.16667		-141	0	0	4.16667
119				24	0		-142	0	0	0
120		CG	22	24	91.6667		-143	91.6667	0	0
121				24	0		-144	0	0	0
122				24	0		-145	0	0	0
123				24	0		-146	0	0	0
124				24	0		-147	0	0	0
125		CHH	1	24	4.16667		-148	0	0	4.16667
126				24	0		-149	0	0	0
127		CHH	3	24	12.5		-150	0	0	12.5
128		CHH	3	24	12.5		-151	0	0	12.5
129				24	0		-152	0	0	0
130		CG	24	24	100		-153	100	0	0
131				24	0		-154	0	0	0
132				24	0		-155	0	0	0
133				24	0		-156	0	0	0
134				24	0		-157	0	0	0
135				24	0		-158	0	0	0
136				24	0		-159	0	0	0
137				24	0		-160	0	0	0
138				24	0		-161	0	0	0
139				24	0		-162	0	0	0
140				24	0		-163	0	0	0
141				24	0		-164	0	0	0
142				24	0		-165	0	0	0
143		CHH		24	0		-166	0	0	0
144		CHH		24	0		-167	0	0	0
145				24	0		-168	0	0	0
146				24	0		-169	0	0	0
147		CHH	3	24	12.5		-170	0	0	12.5
148				24	0		-171	0	0	0
149				24	0		-172	0	0	0
150				24	0		-173	0	0	0
151				24	0		-174	0	0	0
152				24	0		-175	0	0	0
153				24	0		-176	0	0	0
154				24	0		-177	0	0	0
155		CHH		24	0		-178	0	0	0
156		CHH	1	24	4.16667		-179	0	0	4.16667
157				24	0		-180	0	0	0
158		CHG	24	24	100		-181	0	100	0
159				24	0		-182	0	0	0
160				24	0		-183	0	0	0
161				24	0		-184	0	0	0
162		CG	22	24	91.6667		-185	91.6667	0	0
163				24	0		-186	0	0	0
164				24	0		-187	0	0	0
165		CHG	23	24	95.8333		-188	0	95.8333	0
166				24	0		-189	0	0	0
167				24	0		-190	0	0	0
168				24	0		-191	0	0	0
169				24	0		-192	0	0	0
170				24	0		-193	0	0	0
171		CHH		24	0		-194	0	0	0
172				24	0		-195	0	0	0
173				24	0		-196	0	0	0
174		CHH	5	24	20.8333		-197	0	0	20.8333
175				24	0		-198	0	0	0
176				24	0		-199	0	0	0
177		CHH	4	24	16.6667		-200	0	0	16.6667
178				24	0		-201	0	0	0
179				24	0		-202	0	0	0
180		CG	22	24	91.6667		-203	91.6667	0	0
181				24	0		-204	0	0	0
182				24	0		-205	0	0	0
183				24	0		-206	0	0	0
184				24	0		-207	0	0	0
185				24	0		-208	0	0	0
186		CHH	1	24	4.16667		-209	0	0	4.16667
187		CHH		24	0		-210	0	0	0
188				24	0		-211	0	0	0
189				24	0		-212	0	0	0
190				24	0		-213	0	0	0
191		CHH		24	0		-214	0	0	0
192		CHH	3	24	12.5		-215	0	0	12.5
193				24	0		-216	0	0	0
194				24	0		-217	0	0	0
195				24	0		-218	0	0	0
196				24	0		-219	0	0	0
197				24	0		-220	0	0	0
198		CG	13	24	54.1667		-221	54.1667	0	0
199				24	0		-222	0	0	0
200		CHH	3	24	12.5		-223	0	0	12.5
201				24	0		-224	0	0	0
202				24	0		-225	0	0	0
203				24	0		-226	0	0	0
204				24	0		-227	0	0	0
205				24	0		-228	0	0	0
206				24	0		-229	0	0	0
207				24	0		-230	0	0	0
208				24	0		-231	0	0	0
209		CHH	2	24	8.33333		-232	0	0	8.33333
210				24	0		-233	0	0	0
211				24	0		-234	0	0	0
212				24	0		-235	0	0	0
213				24	0		-236	0	0	0
214				24	0		-237	0	0	0
215				24	0		-238	0	0	0
216				24	0		-239	0	0	0
217				24	0		-240	0	0	0
218				24	0		-241	0	0	0
219				24	0		-242	0	0	0
220				24	0		-243	0	0	0
221		CHH	1	24	4.16667		-244	0	0	4.16667
222		CHH	1	24	4.16667		-245	0	0	4.16667
223				24	0		-246	0	0	0
224		CHH		24	0		-247	0	0	0
225		CHH		24	0		-248	0	0	0
226				24	0		-249	0	0	0
227				24	0		-250	0	0	0
228		CHH		24	0		-251	0	0	0
229		CHH		24	0		-252	0	0	0
230				24	0		-253	0	0	0
231				24	0		-254	0	0	0
232				24	0		-255	0	0	0
233				24	0		-256	0	0	0
234		CHH		24	0		-257	0	0	0
235		CHH		24	0		-258	0	0	0
236				24	0		-259	0	0	0
237		CHH	1	24	4.16667		-260	0	0	4.16667
238				24	0		-261	0	0	0
239				24	0		-262	0	0	0
240				24	0		-263	0	0	0
241		CHH	2	24	8.33333		-264	0	0	8.33333
242				24	0		-265	0	0	0
243				24	0		-266	0	0	0
244		CHH	5	24	20.8333		-267	0	0	20.8333
245				24	0		-268	0	0	0
246		CHH	4	24	16.6667		-269	0	0	16.6667
247				24	0		-270	0	0	0
248				24	0		-271	0	0	0
249				24	0		-272	0	0	0
250				24	0		-273	0	0	0
251				24	0		-274	0	0	0
252				24	0		-275	0	0	0
253				24	0		-276	0	0	0
254				24	0		-277	0	0	0
255				24	0		-278	0	0	0
256				24	0		-279	0	0	0
257		CHG	19	24	79.1667		-280	0	79.1667	0
258				24	0		-281	0	0	0
259				24	0		-282	0	0	0
260				24	0		-283	0	0	0
261				24	0		-284	0	0	0
262				24	0		-285	0	0	0
263				24	0		-286	0	0	0
264		CHG	21	24	87.5		-287	0	87.5	0
265				24	0		-288	0	0	0
266				24	0		-289	0	0	0
267				24	0		-290	0	0	0
268				24	0		-291	0	0	0
269		CHH	2	24	8.33333		-292	0	0	8.33333
270				24	0		-293	0	0	0
271				24	0		-294	0	0	0
272				24	0		-295	0	0	0
273				24	0		-296	0	0	0
274				24	0		-297	0	0	0
275				24	0		-298	0	0	0
276				24	0		-299	0	0	0
277				24	0		-300	0	0	0
278		CHG	20	24	83.3333		-301	0	83.3333	0
279		CG	24	24	100		-302	100	0	0
280				24	0		-303	0	0	0
281				24	0		-304	0	0	0
282				24	0		-305	0	0	0
283				24	0		-306	0	0	0
284				24	0		-307	0	0	0
285				24	0		-308	0	0	0
286				24	0		-309	0	0	0
287				24	0		-310	0	0	0
288				24	0		-311	0	0	0
289				24	0		-312	0	0	0
290		CHG	21	24	87.5		-313	0	87.5	0
291		CG	23	24	95.8333		-314	95.8333	0	0
292				24	0		-315	0	0	0
293				24	0		-316	0	0	0
294				24	0		-317	0	0	0
295				24	0		-318	0	0	0
296				24	0		-319	0	0	0
297				24	0		-320	0	0	0
298				24	0		-321	0	0	0
299				24	0		-322	0	0	0
300		CHH		24	0		-323	0	0	0
301		CHH		24	0		-324	0	0	0
302		CHH	20	24	83.3333		-325	0	0	83.3333
303				24	0		-326	0	0	0
304				24	0		-327	0	0	0
305				24	0		-328	0	0	0
306				24	0		-329	0	0	0
307				24	0		-330	0	0	0
308				24	0		-331	0	0	0
309				24	0		-332	0	0	0
310				24	0		-333	0	0	0
311				24	0		-334	0	0	0
312				24	0		-335	0	0	0
313				24	0		-336	0	0	0
314				24	0		-337	0	0	0
315				24	0		-338	0	0	0
316		CHH	23	24	95.8333		-339	0	0	95.8333
317				24	0		-340	0	0	0
318		CHH	21	24	87.5		-341	0	0	87.5
319				24	0		-342	0	0	0
320				24	0		-343	0	0	0
321				24	0		-344	0	0	0

## Sheet: 208ORN(Vein) minus Fig.5
N=	23
		types	Cme	# samples	% methylation			CG	CHG	CHH
1				23	0		-24	0	0	0			# sites	Cme	%
2				23	0		-25	0	0	0		CHH	1173	296	25.2344		CHH	25.2344
3				23	0		-26	0	0	0		CHG	161	101	62.7329		CHG	62.7329
4				23	0		-27	0	0	0		CG	276	176	63.7681		CG	63.7681
5				23	0		-28	0	0	0		Total	1610	573	35.5901		Total	35.5901
6				23	0		-29	0	0	0
7				23	0		-30	0	0	0
8				23	0		-31	0	0	0
9				23	0		-32	0	0	0
10				23	0		-33	0	0	0
11				23	0		-34	0	0	0
12				23	0		-35	0	0	0
13				23	0		-36	0	0	0
14				23	0		-37	0	0	0
15				23	0		-38	0	0	0
16				23	0		-39	0	0	0
17				23	0		-40	0	0	0
18		CHH	4	23	17.3913		-41	0	0	17.3913
19				23	0		-42	0	0	0
20				23	0		-43	0	0	0
21				23	0		-44	0	0	0
22		CG	7	23	30.4348		-45	30.4348	0	0
23				23	0		-46	0	0	0
24				23	0		-47	0	0	0
25				23	0		-48	0	0	0
26				23	0		-49	0	0	0
27				23	0		-50	0	0	0
28				23	0		-51	0	0	0
29				23	0		-52	0	0	0
30				23	0		-53	0	0	0
31				23	0		-54	0	0	0
32				23	0		-55	0	0	0
33				23	0		-56	0	0	0
34				23	0		-57	0	0	0
35				23	0		-58	0	0	0
36				23	0		-59	0	0	0
37				23	0		-60	0	0	0
38				23	0		-61	0	0	0
39				23	0		-62	0	0	0
40				23	0		-63	0	0	0
41				23	0		-64	0	0	0
42		CG	12	23	52.1739		-65	52.1739	0	0
43				23	0		-66	0	0	0
44				23	0		-67	0	0	0
45		CHH	1	23	4.34783		-68	0	0	4.34783
46				23	0		-69	0	0	0
47				23	0		-70	0	0	0
48		CHH	1	23	4.34783		-71	0	0	4.34783
49		CHH	3	23	13.0435		-72	0	0	13.0435
50		CHH	2	23	8.69565		-73	0	0	8.69565
51				23	0		-74	0	0	0
52				23	0		-75	0	0	0
53				23	0		-76	0	0	0
54		CG	17	23	73.913		-77	73.913	0	0
55				23	0		-78	0	0	0
56				23	0		-79	0	0	0
57		CHG	8	23	34.7826		-80	0	34.7826	0
58				23	0		-81	0	0	0
59				23	0		-82	0	0	0
60				23	0		-83	0	0	0
61				23	0		-84	0	0	0
62				23	0		-85	0	0	0
63				23	0		-86	0	0	0
64				23	0		-87	0	0	0
65				23	0		-88	0	0	0
66				23	0		-89	0	0	0
67				23	0		-90	0	0	0
68				23	0		-91	0	0	0
69		CHH	5	23	21.7391		-92	0	0	21.7391
70				23	0		-93	0	0	0
71		CHH	4	23	17.3913		-94	0	0	17.3913
72				23	0		-95	0	0	0
73				23	0		-96	0	0	0
74		CHH	3	23	13.0435		-97	0	0	13.0435
75				23	0		-98	0	0	0
76				23	0		-99	0	0	0
77				23	0		-100	0	0	0
78		CHH	4	23	17.3913		-101	0	0	17.3913
79		CHH	2	23	8.69565		-102	0	0	8.69565
80				23	0		-103	0	0	0
81		CHH	2	23	8.69565		-104	0	0	8.69565
82				23	0		-105	0	0	0
83				23	0		-106	0	0	0
84				23	0		-107	0	0	0
85		CHH	4	23	17.3913		-108	0	0	17.3913
86				23	0		-109	0	0	0
87				23	0		-110	0	0	0
88				23	0		-111	0	0	0
89				23	0		-112	0	0	0
90				23	0		-113	0	0	0
91				23	0		-114	0	0	0
92				23	0		-115	0	0	0
93				23	0		-116	0	0	0
94		CG	18	23	78.2609		-117	78.2609	0	0
95				23	0		-118	0	0	0
96				23	0		-119	0	0	0
97				23	0		-120	0	0	0
98				23	0		-121	0	0	0
99				23	0		-122	0	0	0
100				23	0		-123	0	0	0
101				23	0		-124	0	0	0
102				23	0		-125	0	0	0
103				23	0		-126	0	0	0
104				23	0		-127	0	0	0
105		CG	17	23	73.913		-128	73.913	0	0
106				23	0		-129	0	0	0
107				23	0		-130	0	0	0
108		CHH	10	23	43.4783		-131	0	0	43.4783
109				23	0		-132	0	0	0
110				23	0		-133	0	0	0
111		CHH	9	23	39.1304		-134	0	0	39.1304
112				23	0		-135	0	0	0
113				23	0		-136	0	0	0
114				23	0		-137	0	0	0
115				23	0		-138	0	0	0
116				23	0		-139	0	0	0
117		CHH	5	23	21.7391		-140	0	0	21.7391
118		CHH	5	23	21.7391		-141	0	0	21.7391
119				23	0		-142	0	0	0
120		CG	17	23	73.913		-143	73.913	0	0
121				23	0		-144	0	0	0
122				23	0		-145	0	0	0
123				23	0		-146	0	0	0
124				23	0		-147	0	0	0
125		CHH	5	23	21.7391		-148	0	0	21.7391
126				23	0		-149	0	0	0
127		CHH	6	23	26.087		-150	0	0	26.087
128		CHH	5	23	21.7391		-151	0	0	21.7391
129				23	0		-152	0	0	0
130		CG	6	23	26.087		-153	26.087	0	0
131				23	0		-154	0	0	0
132				23	0		-155	0	0	0
133				23	0		-156	0	0	0
134				23	0		-157	0	0	0
135				23	0		-158	0	0	0
136				23	0		-159	0	0	0
137				23	0		-160	0	0	0
138				23	0		-161	0	0	0
139				23	0		-162	0	0	0
140				23	0		-163	0	0	0
141				23	0		-164	0	0	0
142				23	0		-165	0	0	0
143		CHH	5	23	21.7391		-166	0	0	21.7391
144		CHH	12	23	52.1739		-167	0	0	52.1739
145				23	0		-168	0	0	0
146				23	0		-169	0	0	0
147		CHH	5	23	21.7391		-170	0	0	21.7391
148				23	0		-171	0	0	0
149				23	0		-172	0	0	0
150				23	0		-173	0	0	0
151				23	0		-174	0	0	0
152				23	0		-175	0	0	0
153				23	0		-176	0	0	0
154				23	0		-177	0	0	0
155		CHH	4	23	17.3913		-178	0	0	17.3913
156		CHH	8	23	34.7826		-179	0	0	34.7826
157				23	0		-180	0	0	0
158		CHG	20	23	86.9565		-181	0	86.9565	0
159				23	0		-182	0	0	0
160				23	0		-183	0	0	0
161				23	0		-184	0	0	0
162		CG	21	23	91.3043		-185	91.3043	0	0
163				23	0		-186	0	0	0
164				23	0		-187	0	0	0
165		CHG	18	23	78.2609		-188	0	78.2609	0
166				23	0		-189	0	0	0
167				23	0		-190	0	0	0
168				23	0		-191	0	0	0
169				23	0		-192	0	0	0
170				23	0		-193	0	0	0
171		CHH	6	23	26.087		-194	0	0	26.087
172				23	0		-195	0	0	0
173				23	0		-196	0	0	0
174		CHH	12	23	52.1739		-197	0	0	52.1739
175				23	0		-198	0	0	0
176				23	0		-199	0	0	0
177		CHH	10	23	43.4783		-200	0	0	43.4783
178				23	0		-201	0	0	0
179				23	0		-202	0	0	0
180		CG	13	23	56.5217		-203	56.5217	0	0
181				23	0		-204	0	0	0
182				23	0		-205	0	0	0
183				23	0		-206	0	0	0
184				23	0		-207	0	0	0
185				23	0		-208	0	0	0
186		CHH	2	23	8.69565		-209	0	0	8.69565
187		CHH	4	23	17.3913		-210	0	0	17.3913
188				23	0		-211	0	0	0
189				23	0		-212	0	0	0
190				23	0		-213	0	0	0
191		CHH	8	23	34.7826		-214	0	0	34.7826
192		CHH	5	23	21.7391		-215	0	0	21.7391
193				23	0		-216	0	0	0
194				23	0		-217	0	0	0
195				23	0		-218	0	0	0
196				23	0		-219	0	0	0
197				23	0		-220	0	0	0
198		CG	15	23	65.2174		-221	65.2174	0	0
199				23	0		-222	0	0	0
200		CHH	4	23	17.3913		-223	0	0	17.3913
201				23	0		-224	0	0	0
202				23	0		-225	0	0	0
203				23	0		-226	0	0	0
204				23	0		-227	0	0	0
205				23	0		-228	0	0	0
206				23	0		-229	0	0	0
207				23	0		-230	0	0	0
208				23	0		-231	0	0	0
209		CHH	2	23	8.69565		-232	0	0	8.69565
210				23	0		-233	0	0	0
211				23	0		-234	0	0	0
212				23	0		-235	0	0	0
213				23	0		-236	0	0	0
214				23	0		-237	0	0	0
215				23	0		-238	0	0	0
216				23	0		-239	0	0	0
217				23	0		-240	0	0	0
218				23	0		-241	0	0	0
219				23	0		-242	0	0	0
220				23	0		-243	0	0	0
221		CHH	1	23	4.34783		-244	0	0	4.34783
222		CHH	3	23	13.0435		-245	0	0	13.0435
223				23	0		-246	0	0	0
224		CHH	5	23	21.7391		-247	0	0	21.7391
225		CHH	2	23	8.69565		-248	0	0	8.69565
226				23	0		-249	0	0	0
227				23	0		-250	0	0	0
228		CHH	3	23	13.0435		-251	0	0	13.0435
229		CHH	5	23	21.7391		-252	0	0	21.7391
230				23	0		-253	0	0	0
231				23	0		-254	0	0	0
232				23	0		-255	0	0	0
233				23	0		-256	0	0	0
234		CHH	5	23	21.7391		-257	0	0	21.7391
235		CHH	4	23	17.3913		-258	0	0	17.3913
236				23	0		-259	0	0	0
237		CHH	6	23	26.087		-260	0	0	26.087
238				23	0		-261	0	0	0
239				23	0		-262	0	0	0
240				23	0		-263	0	0	0
241		CHH	7	23	30.4348		-264	0	0	30.4348
242				23	0		-265	0	0	0
243				23	0		-266	0	0	0
244		CHH	7	23	30.4348		-267	0	0	30.4348
245				23	0		-268	0	0	0
246		CHH	4	23	17.3913		-269	0	0	17.3913
247				23	0		-270	0	0	0
248				23	0		-271	0	0	0
249				23	0		-272	0	0	0
250				23	0		-273	0	0	0
251				23	0		-274	0	0	0
252				23	0		-275	0	0	0
253				23	0		-276	0	0	0
254				23	0		-277	0	0	0
255				23	0		-278	0	0	0
256				23	0		-279	0	0	0
257		CHG	9	23	39.1304		-280	0	39.1304	0
258				23	0		-281	0	0	0
259				23	0		-282	0	0	0
260				23	0		-283	0	0	0
261				23	0		-284	0	0	0
262				23	0		-285	0	0	0
263				23	0		-286	0	0	0
264		CHG	13	23	56.5217		-287	0	56.5217	0
265				23	0		-288	0	0	0
266				23	0		-289	0	0	0
267				23	0		-290	0	0	0
268				23	0		-291	0	0	0
269		CHH	2	23	8.69565		-292	0	0	8.69565
270				23	0		-293	0	0	0
271				23	0		-294	0	0	0
272				23	0		-295	0	0	0
273				23	0		-296	0	0	0
274				23	0		-297	0	0	0
275				23	0		-298	0	0	0
276				23	0		-299	0	0	0
277				23	0		-300	0	0	0
278		CHG	15	23	65.2174		-301	0	65.2174	0
279		CG	16	23	69.5652		-302	69.5652	0	0
280				23	0		-303	0	0	0
281				23	0		-304	0	0	0
282				23	0		-305	0	0	0
283				23	0		-306	0	0	0
284				23	0		-307	0	0	0
285				23	0		-308	0	0	0
286				23	0		-309	0	0	0
287				23	0		-310	0	0	0
288				23	0		-311	0	0	0
289				23	0		-312	0	0	0
290		CHG	18	23	78.2609		-313	0	78.2609	0
291		CG	17	23	73.913		-314	73.913	0	0
292				23	0		-315	0	0	0
293				23	0		-316	0	0	0
294				23	0		-317	0	0	0
295				23	0		-318	0	0	0
296				23	0		-319	0	0	0
297				23	0		-320	0	0	0
298				23	0		-321	0	0	0
299				23	0		-322	0	0	0
300		CHH	5	23	21.7391		-323	0	0	21.7391
301		CHH	5	23	21.7391		-324	0	0	21.7391
302		CHH	21	23	91.3043		-325	0	0	91.3043
303				23	0		-326	0	0	0
304				23	0		-327	0	0	0
305				23	0		-328	0	0	0
306				23	0		-329	0	0	0
307				23	0		-330	0	0	0
308				23	0		-331	0	0	0
309				23	0		-332	0	0	0
310				23	0		-333	0	0	0
311				23	0		-334	0	0	0
312				23	0		-335	0	0	0
313				23	0		-336	0	0	0
314				23	0		-337	0	0	0
315				23	0		-338	0	0	0
316		CHH	22	23	95.6522		-339	0	0	95.6522
317				23	0		-340	0	0	0
318		CHH	22	23	95.6522		-341	0	0	95.6522
319				23	0		-342	0	0	0
320				23	0		-343	0	0	0
321				23	0		-344	0	0	0

## Sheet: Vein RED-ORN plus Fig.6 
RED	CG	CHG	CHH		ORN	CG	CHG	CHH			CG	CHG	CHH
-344	0	0	0		-344	0	0	0		-344	0	0	0
-343	0	0	0		-343	0	0	0		-343	0	0	0
-342	0	0	0		-342	0	0	0		-342	0	0	0
-341	0	0	0		-341	0	0	0		-341	0	0	0
-340	0	0	0		-340	0	0	0		-340	0	0	0
-339	0	0	0		-339	0	0	0		-339	0	0	0
-338	0	0	0		-338	0	0	0		-338	0	0	0
-337	0	0	0		-337	0	0	0		-337	0	0	0
-336	0	0	0		-336	0	0	0		-336	0	0	0
-335	0	0	0		-335	0	0	0		-335	0	0	0
-334	0	0	0		-334	0	0	0		-334	0	0	0
-333	0	0	0		-333	0	0	0		-333	0	0	0
-332	0	0	0		-332	0	0	0		-332	0	0	0
-331	0	0	0		-331	0	0	0		-331	0	0	0
-330	0	0	0		-330	0	0	0		-330	0	0	0
-329	0	0	0		-329	0	0	0		-329	0	0	0
-328	0	0	0		-328	0	0	0		-328	0	0	0
-327	0	0	0		-327	0	0	0		-327	0	0	0
-326	0	0	0		-326	0	0	0		-326	0	0	0
-325	0	0	0		-325	0	0	0		-325	0	0	0
-324	0	0	0		-324	0	0	0		-324	0	0	0
-323	0	0	0		-323	0	0	0		-323	0	0	0
-322	0	0	0		-322	0	0	0		-322	0	0	0
-321	0	0	0		-321	0	0	0		-321	0	0	0
-320	0	0	0		-320	0	0	0		-320	0	0	0
-319	0	0	0		-319	0	0	0		-319	0	0	0
-318	0	0	0		-318	0	0	0		-318	0	0	0
-317	0	0	0		-317	0	0	0		-317	0	0	0
-316	0	33.3333	0		-316	0	29.1667	0		-316	0	4.16667	0
-315	54.1667	0	0		-315	25	0	0		-315	29.1667	0	0
-314	0	0	0		-314	0	0	0		-314	0	0	0
-313	0	0	0		-313	0	0	0		-313	0	0	0
-312	0	0	0		-312	0	0	0		-312	0	0	0
-311	0	0	0		-311	0	0	0		-311	0	0	0
-310	0	0	0		-310	0	0	0		-310	0	0	0
-309	0	0	8.33333		-309	0	0	12.5		-309	0	0	-4.16667
-308	0	0	4.16667		-308	0	0	8.33333		-308	0	0	-4.16667
-307	0	0	0		-307	0	0	0		-307	0	0	0
-306	0	0	12.5		-306	0	0	20.8333		-306	0	0	-8.33333
-305	0	0	16.6667		-305	0	0	8.33333		-305	0	0	8.33333
-304	0	0	0		-304	0	0	0		-304	0	0	0
-303	50	0	0		-303	29.1667	0	0		-303	20.8333	0	0
-302	0	0	0		-302	0	0	0		-302	0	0	0
-301	0	0	0		-301	0	0	0		-301	0	0	0
-300	0	0	0		-300	0	0	0		-300	0	0	0
-299	0	0	0		-299	0	0	0		-299	0	0	0
-298	0	0	0		-298	0	0	0		-298	0	0	0
-297	0	0	54.1667		-297	0	0	66.6667		-297	0	0	-12.5
-296	0	0	8.33333		-296	0	0	12.5		-296	0	0	-4.16667
-295	0	0	0		-295	0	0	0		-295	0	0	0
-294	0	0	0		-294	0	0	0		-294	0	0	0
-293	0	0	0		-293	0	0	0		-293	0	0	0
-292	0	0	0		-292	0	0	0		-292	0	0	0
-291	0	0	0		-291	0	0	4.16667		-291	0	0	-4.16667
-290	0	0	0		-290	0	0	12.5		-290	0	0	-12.5
-289	0	37.5	0		-289	0	29.1667	0		-289	0	8.33333	0
-288	0	0	0		-288	0	0	0		-288	0	0	0
-287	0	0	0		-287	0	0	0		-287	0	0	0
-286	0	0	4.16667		-286	0	0	8.33333		-286	0	0	-4.16667
-285	0	0	0		-285	0	0	0		-285	0	0	0
-284	0	0	0		-284	0	0	0		-284	0	0	0
-283	0	0	0		-283	0	0	0		-283	0	0	0
-282	0	37.5	0		-282	0	20.8333	0		-282	0	16.6667	0
-281	0	0	0		-281	0	0	0		-281	0	0	0
-280	0	0	0		-280	0	0	0		-280	0	0	0
-279	0	0	0		-279	0	0	0		-279	0	0	0
-278	0	0	8.33333		-278	0	0	4.16667		-278	0	0	4.16667
-277	0	0	0		-277	0	0	0		-277	0	0	0
-276	0	0	0		-276	0	0	4.16667		-276	0	0	-4.16667
-275	0	0	0		-275	0	0	0		-275	0	0	0
-274	0	0	0		-274	0	0	0		-274	0	0	0
-273	0	0	0		-273	0	0	0		-273	0	0	0
-272	0	0	0		-272	0	0	0		-272	0	0	0
-271	0	0	0		-271	0	0	0		-271	0	0	0
-270	0	0	0		-270	0	0	0		-270	0	0	0
-269	0	0	0		-269	0	0	0		-269	0	0	0
-268	0	0	0		-268	0	0	0		-268	0	0	0
-267	0	0	0		-267	0	0	0		-267	0	0	0
-266	0	0	0		-266	0	0	0		-266	0	0	0
-265	0	0	0		-265	0	0	0		-265	0	0	0
-264	0	0	0		-264	0	0	0		-264	0	0	0
-263	0	0	0		-263	0	0	0		-263	0	0	0
-262	0	0	0		-262	0	0	0		-262	0	0	0
-261	0	0	0		-261	0	0	0		-261	0	0	0
-260	0	0	0		-260	0	0	0		-260	0	0	0
-259	0	0	0		-259	0	0	0		-259	0	0	0
-258	0	0	0		-258	0	0	0		-258	0	0	0
-257	0	0	0		-257	0	0	0		-257	0	0	0
-256	0	0	0		-256	0	0	0		-256	0	0	0
-255	0	0	0		-255	0	0	0		-255	0	0	0
-254	0	0	0		-254	0	0	0		-254	0	0	0
-253	0	0	0		-253	0	0	0		-253	0	0	0
-252	0	0	0		-252	0	0	0		-252	0	0	0
-251	0	0	0		-251	0	0	0		-251	0	0	0
-250	0	0	0		-250	0	0	0		-250	0	0	0
-249	0	0	0		-249	0	0	0		-249	0	0	0
-248	0	0	0		-248	0	0	0		-248	0	0	0
-247	0	0	0		-247	0	0	0		-247	0	0	0
-246	0	0	0		-246	0	0	0		-246	0	0	0
-245	0	0	0		-245	0	0	0		-245	0	0	0
-244	0	0	0		-244	0	0	0		-244	0	0	0
-243	0	0	54.1667		-243	0	0	66.6667		-243	0	0	-12.5
-242	0	0	0		-242	0	0	0		-242	0	0	0
-241	0	0	4.16667		-241	0	0	8.33333		-241	0	0	-4.16667
-240	0	0	8.33333		-240	0	0	16.6667		-240	0	0	-8.33333
-239	0	0	0		-239	0	0	0		-239	0	0	0
-238	0	0	0		-238	0	0	0		-238	0	0	0
-237	0	0	0		-237	0	0	8.33333		-237	0	0	-8.33333
-236	0	0	0		-236	0	0	0		-236	0	0	0
-235	0	0	0		-235	0	0	0		-235	0	0	0
-234	0	0	0		-234	0	0	0		-234	0	0	0
-233	0	0	0		-233	0	0	0		-233	0	0	0
-232	0	0	0		-232	0	0	0		-232	0	0	0
-231	0	0	4.16667		-231	0	0	8.33333		-231	0	0	-4.16667
-230	0	0	8.33333		-230	0	0	8.33333		-230	0	0	0
-229	0	0	0		-229	0	0	0		-229	0	0	0
-228	0	0	0		-228	0	0	0		-228	0	0	0
-227	0	0	4.16667		-227	0	0	12.5		-227	0	0	-8.33333
-226	0	0	0		-226	0	0	0		-226	0	0	0
-225	0	0	0		-225	0	0	0		-225	0	0	0
-224	0	0	0		-224	0	0	0		-224	0	0	0
-223	0	0	0		-223	0	0	0		-223	0	0	0
-222	29.1667	0	0		-222	25	0	0		-222	4.16667	0	0
-221	0	0	0		-221	0	0	0		-221	0	0	0
-220	0	0	0		-220	0	0	0		-220	0	0	0
-219	0	0	0		-219	0	0	0		-219	0	0	0
-218	0	0	0		-218	0	0	0		-218	0	0	0
-217	0	0	0		-217	0	0	0		-217	0	0	0
-216	0	0	0		-216	0	0	0		-216	0	0	0
-215	0	0	0		-215	0	0	0		-215	0	0	0
-214	0	0	0		-214	0	0	0		-214	0	0	0
-213	0	0	0		-213	0	0	0		-213	0	0	0
-212	0	0	0		-212	0	0	0		-212	0	0	0
-211	0	0	0		-211	0	0	0		-211	0	0	0
-210	0	0	0		-210	0	0	0		-210	0	0	0
-209	0	0	0		-209	0	0	0		-209	0	0	0
-208	0	0	54.1667		-208	0	0	66.6667		-208	0	0	-12.5
-207	0	0	58.3333		-207	0	0	79.1667		-207	0	0	-20.8333
-206	0	0	0		-206	0	0	0		-206	0	0	0
-205	0	0	0		-205	0	0	0		-205	0	0	0
-204	91.6667	0	0		-204	91.6667	0	0		-204	0	0	0
-203	0	0	0		-203	0	0	0		-203	0	0	0
-202	0	0	0		-202	0	0	0		-202	0	0	0
-201	0	0	0		-201	0	0	0		-201	0	0	0
-200	0	0	0		-200	0	0	0		-200	0	0	0
-199	0	0	0		-199	0	0	0		-199	0	0	0
-198	0	0	0		-198	0	0	0		-198	0	0	0
-197	0	0	0		-197	0	0	0		-197	0	0	0
-196	0	0	0		-196	0	0	0		-196	0	0	0
-195	0	0	0		-195	0	0	0		-195	0	0	0
-194	0	0	0		-194	0	0	0		-194	0	0	0
-193	0	0	50		-193	0	0	66.6667		-193	0	0	-16.6667
-192	0	0	50		-192	0	0	66.6667		-192	0	0	-16.6667
-191	0	0	0		-191	0	0	0		-191	0	0	0
-190	0	87.5	0		-190	0	75	0		-190	0	12.5	0
-189	0	0	0		-189	0	0	0		-189	0	0	0
-188	0	0	0		-188	0	0	0		-188	0	0	0
-187	0	66.6667	0		-187	0	83.3333	0		-187	0	-16.6667	0
-186	91.6667	0	0		-186	95.8333	0	0		-186	-4.16667	0	0
-185	0	0	0		-185	0	0	0		-185	0	0	0
-184	0	0	0		-184	0	0	0		-184	0	0	0
-183	0	91.6667	0		-183	0	91.6667	0		-183	0	0	0
-182	0	0	0		-182	0	0	0		-182	0	0	0
-181	0	0	0		-181	0	0	0		-181	0	0	0
-180	0	0	0		-180	0	0	0		-180	0	0	0
-179	0	0	0		-179	0	0	0		-179	0	0	0
-178	0	0	0		-178	0	0	0		-178	0	0	0
-177	0	0	0		-177	0	0	0		-177	0	0	0
-176	0	0	54.1667		-176	0	0	66.6667		-176	0	0	-12.5
-175	0	0	50		-175	0	0	70.8333		-175	0	0	-20.8333
-174	0	0	54.1667		-174	0	0	66.6667		-174	0	0	-12.5
-173	0	0	0		-173	0	0	0		-173	0	0	0
-172	0	0	0		-172	0	0	0		-172	0	0	0
-171	0	0	0		-171	0	0	0		-171	0	0	0
-170	0	0	0		-170	0	0	0		-170	0	0	0
-169	0	0	0		-169	0	0	0		-169	0	0	0
-168	0	0	0		-168	0	0	0		-168	0	0	0
-167	0	0	0		-167	0	0	0		-167	0	0	0
-166	0	0	0		-166	0	0	0		-166	0	0	0
-165	0	0	0		-165	0	0	0		-165	0	0	0
-164	0	0	50		-164	0	0	70.8333		-164	0	0	-20.8333
-163	0	0	50		-163	0	0	70.8333		-163	0	0	-20.8333
-162	0	0	50		-162	0	0	70.8333		-162	0	0	-20.8333
-161	0	0	50		-161	0	0	75		-161	0	0	-25
-160	0	0	62.5		-160	0	0	83.3333		-160	0	0	-20.8333
-159	0	0	0		-159	0	0	0		-159	0	0	0
-158	0	0	50		-158	0	0	70.8333		-158	0	0	-20.8333
-157	0	0	50		-157	0	0	70.8333		-157	0	0	-20.8333
-156	0	0	54.1667		-156	0	0	66.6667		-156	0	0	-12.5
-155	0	0	0		-155	0	0	0		-155	0	0	0
-154	41.6667	0	0		-154	12.5	0	0		-154	29.1667	0	0
-153	0	0	0		-153	0	0	0		-153	0	0	0
-152	0	0	0		-152	0	0	0		-152	0	0	0
-151	0	0	0		-151	0	0	0		-151	0	0	0
-150	0	0	0		-150	0	0	0		-150	0	0	0
-149	0	0	0		-149	0	0	0		-149	0	0	0
-148	0	0	0		-148	0	0	0		-148	0	0	0
-147	0	0	58.3333		-147	0	0	83.3333		-147	0	0	-25
-146	0	0	0		-146	0	0	0		-146	0	0	0
-145	0	0	0		-145	0	0	0		-145	0	0	0
-144	95.8333	0	0		-144	87.5	0	0		-144	8.33333	0	0
-143	0	0	0		-143	0	0	0		-143	0	0	0
-142	0	0	0		-142	0	0	0		-142	0	0	0
-141	0	0	0		-141	0	0	0		-141	0	0	0
-140	0	0	0		-140	0	0	0		-140	0	0	0
-139	0	0	0		-139	0	0	0		-139	0	0	0
-138	0	0	0		-138	0	0	0		-138	0	0	0
-137	0	0	0		-137	0	0	0		-137	0	0	0
-136	0	0	0		-136	0	0	0		-136	0	0	0
-135	0	0	0		-135	0	0	0		-135	0	0	0
-134	0	0	0		-134	0	0	0		-134	0	0	0
-133	0	0	0		-133	0	0	0		-133	0	0	0
-132	0	0	0		-132	0	0	0		-132	0	0	0
-131	0	0	0		-131	0	0	0		-131	0	0	0
-130	0	0	0		-130	0	0	0		-130	0	0	0
-129	91.6667	0	0		-129	83.3333	0	0		-129	8.33333	0	0
-128	0	0	0		-128	0	0	0		-128	0	0	0
-127	0	0	0		-127	0	0	0		-127	0	0	0
-126	0	0	0		-126	0	0	0		-126	0	0	0
-125	0	0	58.3333		-125	0	0	75		-125	0	0	-16.6667
-124	0	0	58.3333		-124	0	0	62.5		-124	0	0	-4.16667
-123	0	0	0		-123	0	0	0		-123	0	0	0
-122	0	0	0		-122	0	0	0		-122	0	0	0
-121	0	0	62.5		-121	0	0	66.6667		-121	0	0	-4.16667
-120	0	0	58.3333		-120	0	0	62.5		-120	0	0	-4.16667
-119	0	0	0		-119	0	0	0		-119	0	0	0
-118	95.8333	0	0		-118	83.3333	0	0		-118	12.5	0	0
-117	0	0	0		-117	0	0	0		-117	0	0	0
-116	0	0	0		-116	0	0	0		-116	0	0	0
-115	0	0	50		-115	0	0	70.8333		-115	0	0	-20.8333
-114	0	0	0		-114	0	0	0		-114	0	0	0
-113	0	0	0		-113	0	0	0		-113	0	0	0
-112	0	0	58.3333		-112	0	0	62.5		-112	0	0	-4.16667
-111	0	0	0		-111	0	0	0		-111	0	0	0
-110	0	0	0		-110	0	0	0		-110	0	0	0
-109	0	0	0		-109	0	0	0		-109	0	0	0
-108	0	0	0		-108	0	0	0		-108	0	0	0
-107	0	0	50		-107	0	0	16.6667		-107	0	0	33.3333
-106	0	0	0		-106	0	0	0		-106	0	0	0
-105	0	0	0		-105	0	0	0		-105	0	0	0
-104	0	0	0		-104	0	0	0		-104	0	0	0
-103	0	0	0		-103	0	0	0		-103	0	0	0
-102	0	0	0		-102	0	0	0		-102	0	0	0
-101	0	0	0		-101	0	0	0		-101	0	0	0
-100	0	0	0		-100	0	0	0		-100	0	0	0
-99	0	0	0		-99	0	0	0		-99	0	0	0
-98	0	0	0		-98	0	0	0		-98	0	0	0
-97	0	0	0		-97	0	0	0		-97	0	0	0
-96	0	0	0		-96	0	0	0		-96	0	0	0
-95	0	0	0		-95	0	0	0		-95	0	0	0
-94	0	0	0		-94	0	0	0		-94	0	0	0
-93	0	0	0		-93	0	0	0		-93	0	0	0
-92	0	0	0		-92	0	0	0		-92	0	0	0
-91	0	0	0		-91	0	0	0		-91	0	0	0
-90	0	0	0		-90	0	0	0		-90	0	0	0
-89	0	0	0		-89	0	0	0		-89	0	0	0
-88	0	0	0		-88	0	0	0		-88	0	0	0
-87	0	0	50		-87	0	0	62.5		-87	0	0	-12.5
-86	0	0	0		-86	0	0	0		-86	0	0	0
-85	0	0	50		-85	0	0	62.5		-85	0	0	-12.5
-84	0	0	62.5		-84	0	0	70.8333		-84	0	0	-8.33333
-83	0	0	0		-83	0	0	0		-83	0	0	0
-82	0	87.5	0		-82	0	62.5	0		-82	0	25	0
-81	0	0	0		-81	0	0	0		-81	0	0	0
-80	0	0	0		-80	0	0	0		-80	0	0	0
-79	0	0	0		-79	0	0	0		-79	0	0	0
-78	41.6667	0	0		-78	33.3333	0	0		-78	8.33333	0	0
-77	0	0	0		-77	0	0	0		-77	0	0	0
-76	0	0	0		-76	0	0	0		-76	0	0	0
-75	0	0	0		-75	0	0	0		-75	0	0	0
-74	0	0	0		-74	0	0	0		-74	0	0	0
-73	0	0	0		-73	0	0	0		-73	0	0	0
-72	0	0	0		-72	0	0	0		-72	0	0	0
-71	0	0	0		-71	0	0	0		-71	0	0	0
-70	0	0	0		-70	0	0	0		-70	0	0	0
-69	0	0	0		-69	0	0	0		-69	0	0	0
-68	0	0	0		-68	0	0	0		-68	0	0	0
-67	0	0	0		-67	0	0	0		-67	0	0	0
-66	37.5	0	0		-66	25	0	0		-66	12.5	0	0
-65	0	0	0		-65	0	0	0		-65	0	0	0
-64	0	0	0		-64	0	0	0		-64	0	0	0
-63	0	0	0		-63	0	0	0		-63	0	0	0
-62	0	0	0		-62	0	0	8.33333		-62	0	0	-8.33333
-61	0	0	0		-61	0	0	0		-61	0	0	0
-60	0	0	0		-60	0	0	0		-60	0	0	0
-59	0	0	0		-59	0	0	0		-59	0	0	0
-58	0	0	0		-58	0	0	8.33333		-58	0	0	-8.33333
-57	0	0	0		-57	0	0	4.16667		-57	0	0	-4.16667
-56	0	0	50		-56	0	0	70.8333		-56	0	0	-20.8333
-55	0	0	0		-55	0	0	0		-55	0	0	0
-54	0	0	0		-54	0	0	8.33333		-54	0	0	-8.33333
-53	0	0	0		-53	0	0	0		-53	0	0	0
-52	0	0	0		-52	0	0	0		-52	0	0	0
-51	0	0	0		-51	0	0	0		-51	0	0	0
-50	0	0	0		-50	0	0	0		-50	0	0	0
-49	0	0	4.16667		-49	0	0	8.33333		-49	0	0	-4.16667
-48	0	0	0		-48	0	0	0		-48	0	0	0
-47	0	0	0		-47	0	0	0		-47	0	0	0
-46	50	0	0		-46	62.5	0	0		-46	-12.5	0	0
-45	0	0	0		-45	0	0	0		-45	0	0	0
-44	0	0	4.16667		-44	0	0	0		-44	0	0	4.16667
-43	0	0	0		-43	0	0	0		-43	0	0	0
-42	0	0	0		-42	0	0	0		-42	0	0	0
-41	0	0	0		-41	0	0	0		-41	0	0	0
-40	0	0	0		-40	0	0	0		-40	0	0	0
-39	0	0	4.16667		-39	0	0	0		-39	0	0	4.16667
-38	0	0	0		-38	0	0	0		-38	0	0	0
-37	0	0	0		-37	0	0	0		-37	0	0	0
-36	0	0	0		-36	0	0	0		-36	0	0	0
-35	0	0	0		-35	0	0	0		-35	0	0	0
-34	0	0	0		-34	0	0	0		-34	0	0	0
-33	0	0	8.33333		-33	0	0	4.16667		-33	0	0	4.16667
-32	0	0	0		-32	0	0	0		-32	0	0	0
-31	0	0	8.33333		-31	0	0	4.16667		-31	0	0	4.16667
-30	0	0	0		-30	0	0	0		-30	0	0	0
-29	0	0	0		-29	0	0	0		-29	0	0	0
-28	0	0	0		-28	0	0	0		-28	0	0	0
-27	0	0	0		-27	0	0	0		-27	0	0	0
-26	0	0	0		-26	0	0	0		-26	0	0	0
-25	0	0	0		-25	0	0	0		-25	0	0	0
-24	0	0	0		-24	0	0	0		-24	0	0	0
-23	0	0	0		-23	0	0	0		-23	0	0	0
-22	0	0	0		-22	0	0	0		-22	0	0	0
-21	0	0	0		-21	0	0	0		-21	0	0	0
-20	0	0	0		-20	0	0	0		-20	0	0	0
-19	0	0	0		-19	0	0	0		-19	0	0	0
-18	0	0	0		-18	0	0	0		-18	0	0	0
-17	0	0	0		-17	0	0	0		-17	0	0	0
-16	0	0	0		-16	0	0	0		-16	0	0	0
-15	0	0	0		-15	0	0	0		-15	0	0	0
-14	0	0	0		-14	0	0	0		-14	0	0	0
-13	0	0	0		-13	0	0	0		-13	0	0	0
-12	0	0	0		-12	0	0	0		-12	0	0	0
-11	0	0	0		-11	0	0	0		-11	0	0	0
-10	0	0	0		-10	0	0	0		-10	0	0	0
-9	0	0	0		-9	0	0	0		-9	0	0	0
-8	0	0	0		-8	0	0	0		-8	0	0	0
-7	0	0	0		-7	0	0	0		-7	0	0	0
-6	0	0	0		-6	0	0	0		-6	0	0	0
-5	0	0	0		-5	0	0	0		-5	0	0	0
-4	0	0	0		-4	0	0	0		-4	0	0	0
-3	0	0	0		-3	0	0	0		-3	0	0	0
-2	0	0	0		-2	0	0	0		-2	0	0	0
-1	0	0	0		-1	0	0	0		-1	0	0	0

[truncated: 9 more sheets: Vein RED-ORN minus Fig.6, 208RED(LwV) plus Fig.S2, 208ORN(LwV) plus Fig.S2, 208RED(LwV) minus  Fig.S2, 208ORN(LwV) minus Fig.S2, LwV RED-ORN plus Fig. S3, LwV RED-ORN minus Fig.S3, 2-6-1-7-6 Fig.S4, 2-6-1-7-2 Fig.S4]
